# Supplementary material for: Formation and reactions of azepino[4,5-b]indoles: an unprecedented ozone reaction in the formation of novel benzo[c]naphthyridinones
Source: Royal Society of Chemistry journal article supplement (doi:10.1039/c003742g), 2010-01-01

# Formation and reactions of azepino[4,5-*b*]indoles: An unprecedented ozone reaction in the formation of novel benzo[*c*]naphthyridinones

Scott G. Stewart,\* Emilio L. Ghisalberti, Brian W. Skelton and Charles H. Heath

*The School of Biomedical, Biomolecular & Chemical Sciences, The University of Western Australia, Crawley, WA 6009, Australia; Fax: +61 (8) 6488 1005; E-mail: sgs@cyllene.uwa.edu.au*

Crystal Structure data for compound **18** and **21**

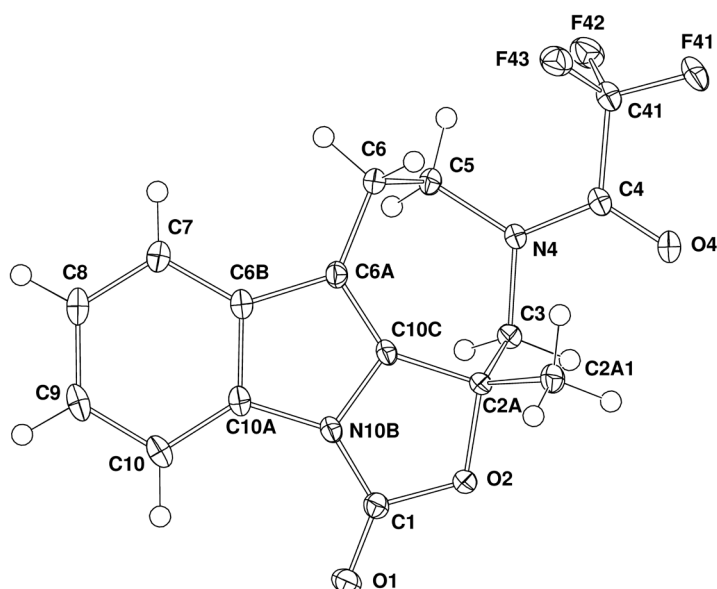

**Figure 1s:** Molecular structure of compound **18**.

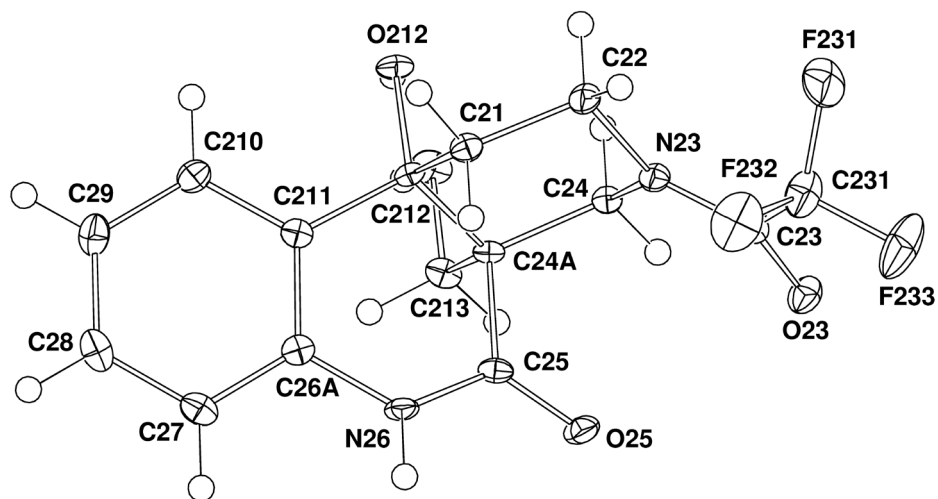

**Figure 2s:** Molecular structure of compound 21.

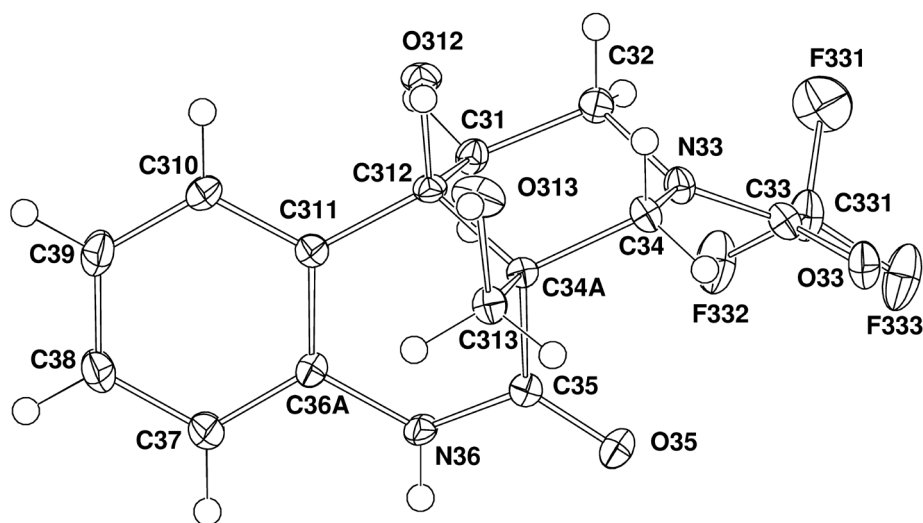

**Figure 3s:** Molecular structure (II) of compound **21**.

**Table 1s.** Hydrogen bonds for **21** [Å and °].

| D-H...A                             | d(D-H)    | d(H...A)  | d(D...A)   | <(DHA)    |
|-------------------------------------|-----------|-----------|------------|-----------|
| N(16)-H(16)...O(25)                 | 0.88      | 2.23      | 3.0866(19) | 165.6     |
| O(112)-H(112)...O(35)               | 0.831(17) | 1.928(19) | 2.7143(18) | 158(3)    |
| O(113)-H(113)...O(33) <sup>1</sup>  | 0.852(17) | 1.944(17) | 2.7936(18) | 175(3)    |
| N(26)-H(26)...O(15)                 | 0.88      | 1.88      | 2.7539(18) | 176.3     |
| O(212)-H(212)...O(213)              | 0.806(16) | 1.891(19) | 2.6071(18) | 147(2)    |
| O(213)-H(213)...O(23) <sup>2</sup>  | 0.774(15) | 2.247(18) | 2.9006(18) | 143(2)    |
| O(213)-H(213)...O(25) <sup>2</sup>  | 0.774(15) | 2.252(19) | 2.8046(18) | 129.0(19) |
| N(36)-H(36)...O(212) <sup>3</sup>   | 0.88      | 2.02      | 2.8621(19) | 160.5     |
| O(312)-H(312)...O(313)              | 0.826(15) | 1.852(16) | 2.606(2)   | 151(2)    |
| O(313)-H(313)...O(113) <sup>1</sup> | 0.843(17) | 1.956(18) | 2.7902(19) | 170(3)    |

Symmetry transformations used to generate equivalent atoms:

<sup>1</sup>  $x+1/2, 1/2-y, 1-z$ ; <sup>2</sup>  $x-1/2, 3/2-y, 1-z$ ; <sup>3</sup>  $1/2-x, 1-y, z-1/2$

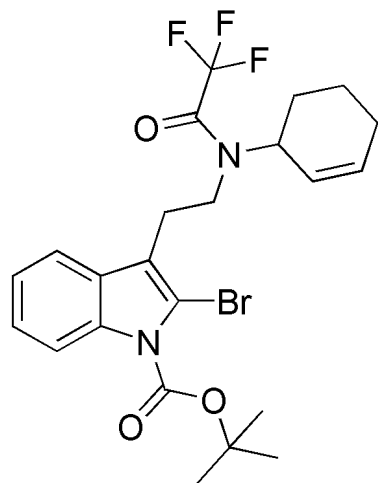

Compound 10, acetone-D<sub>6</sub>, 125.75 MHz

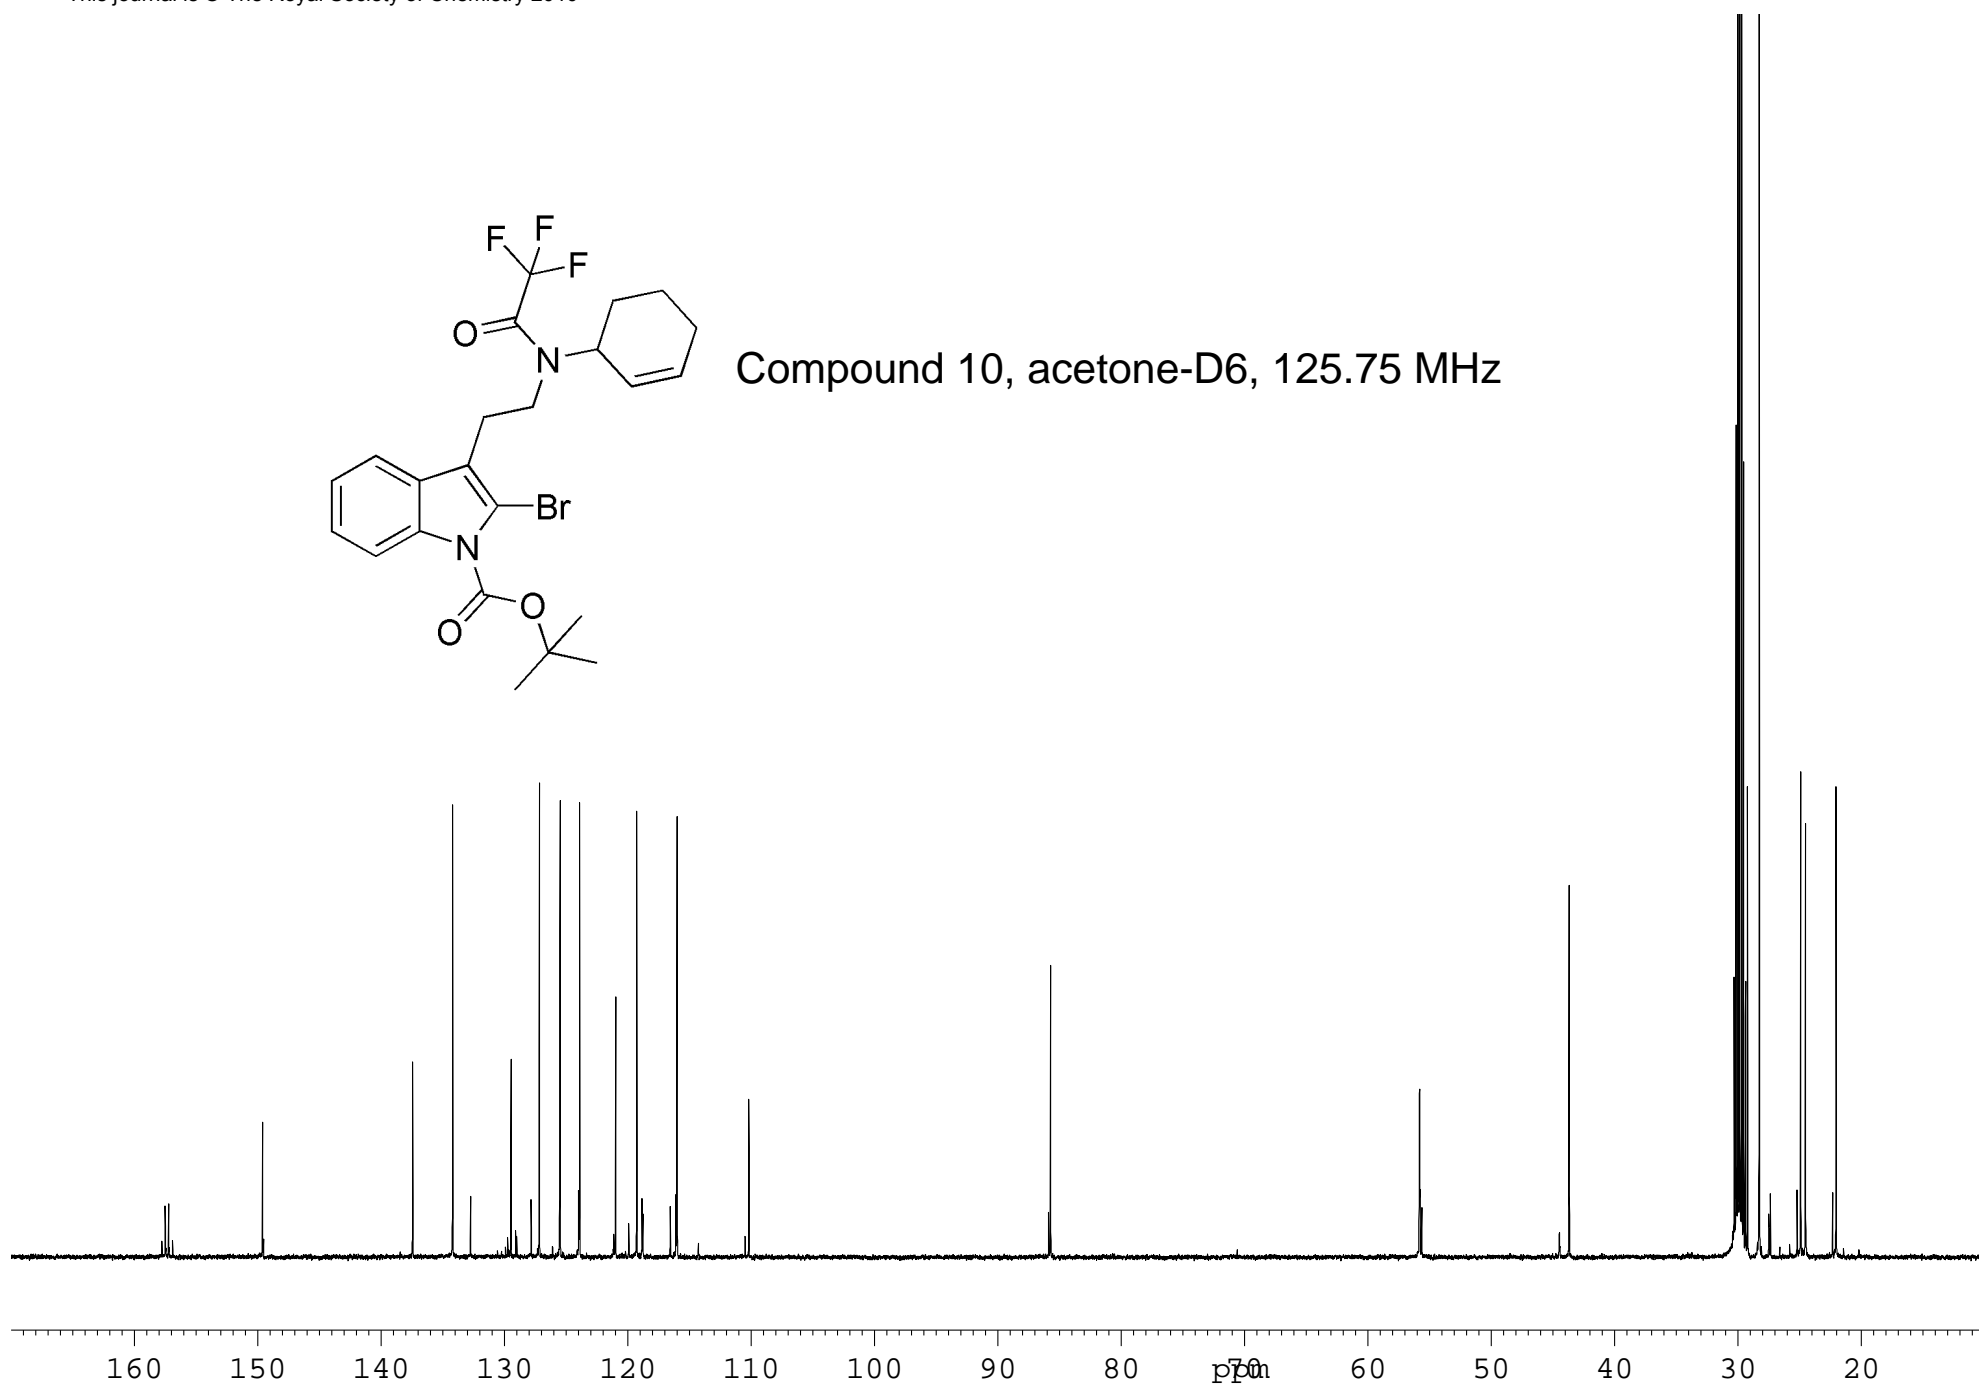

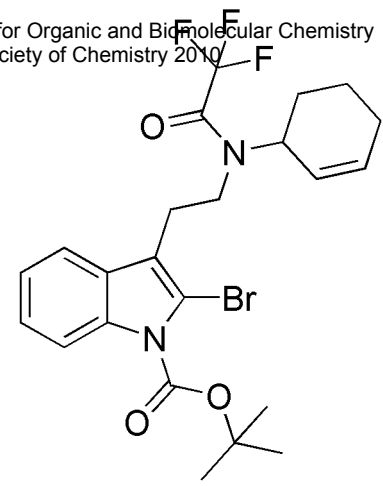

Compound 10, acetone-D6, 500.13 MHz

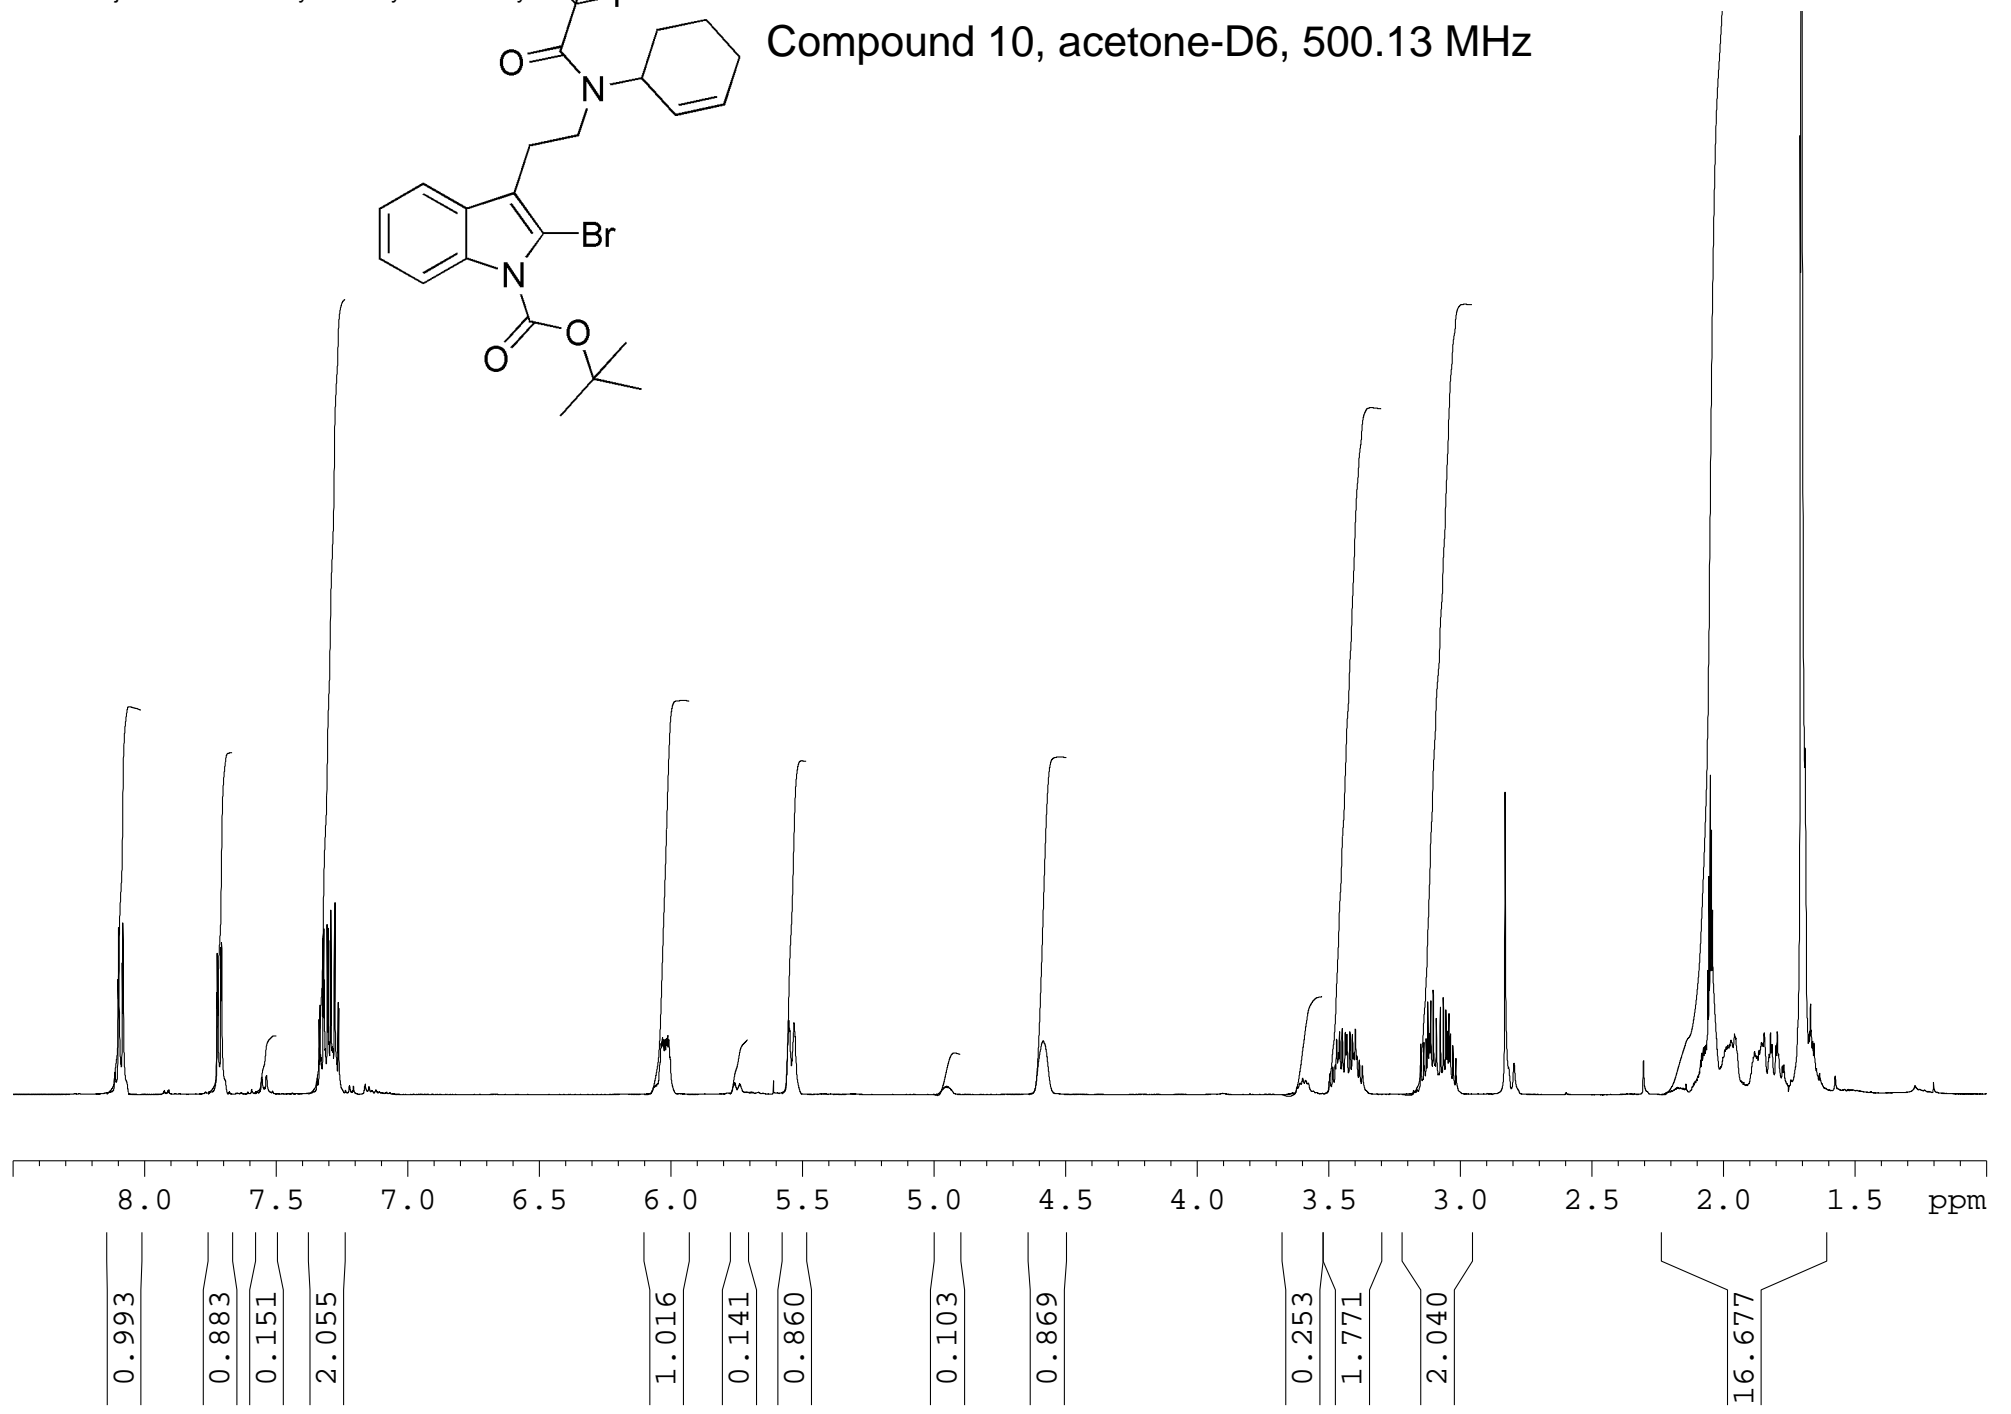

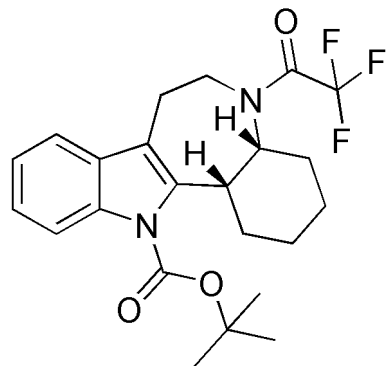

Compound 12a, acetone-D<sub>6</sub>, 150.9 MHz

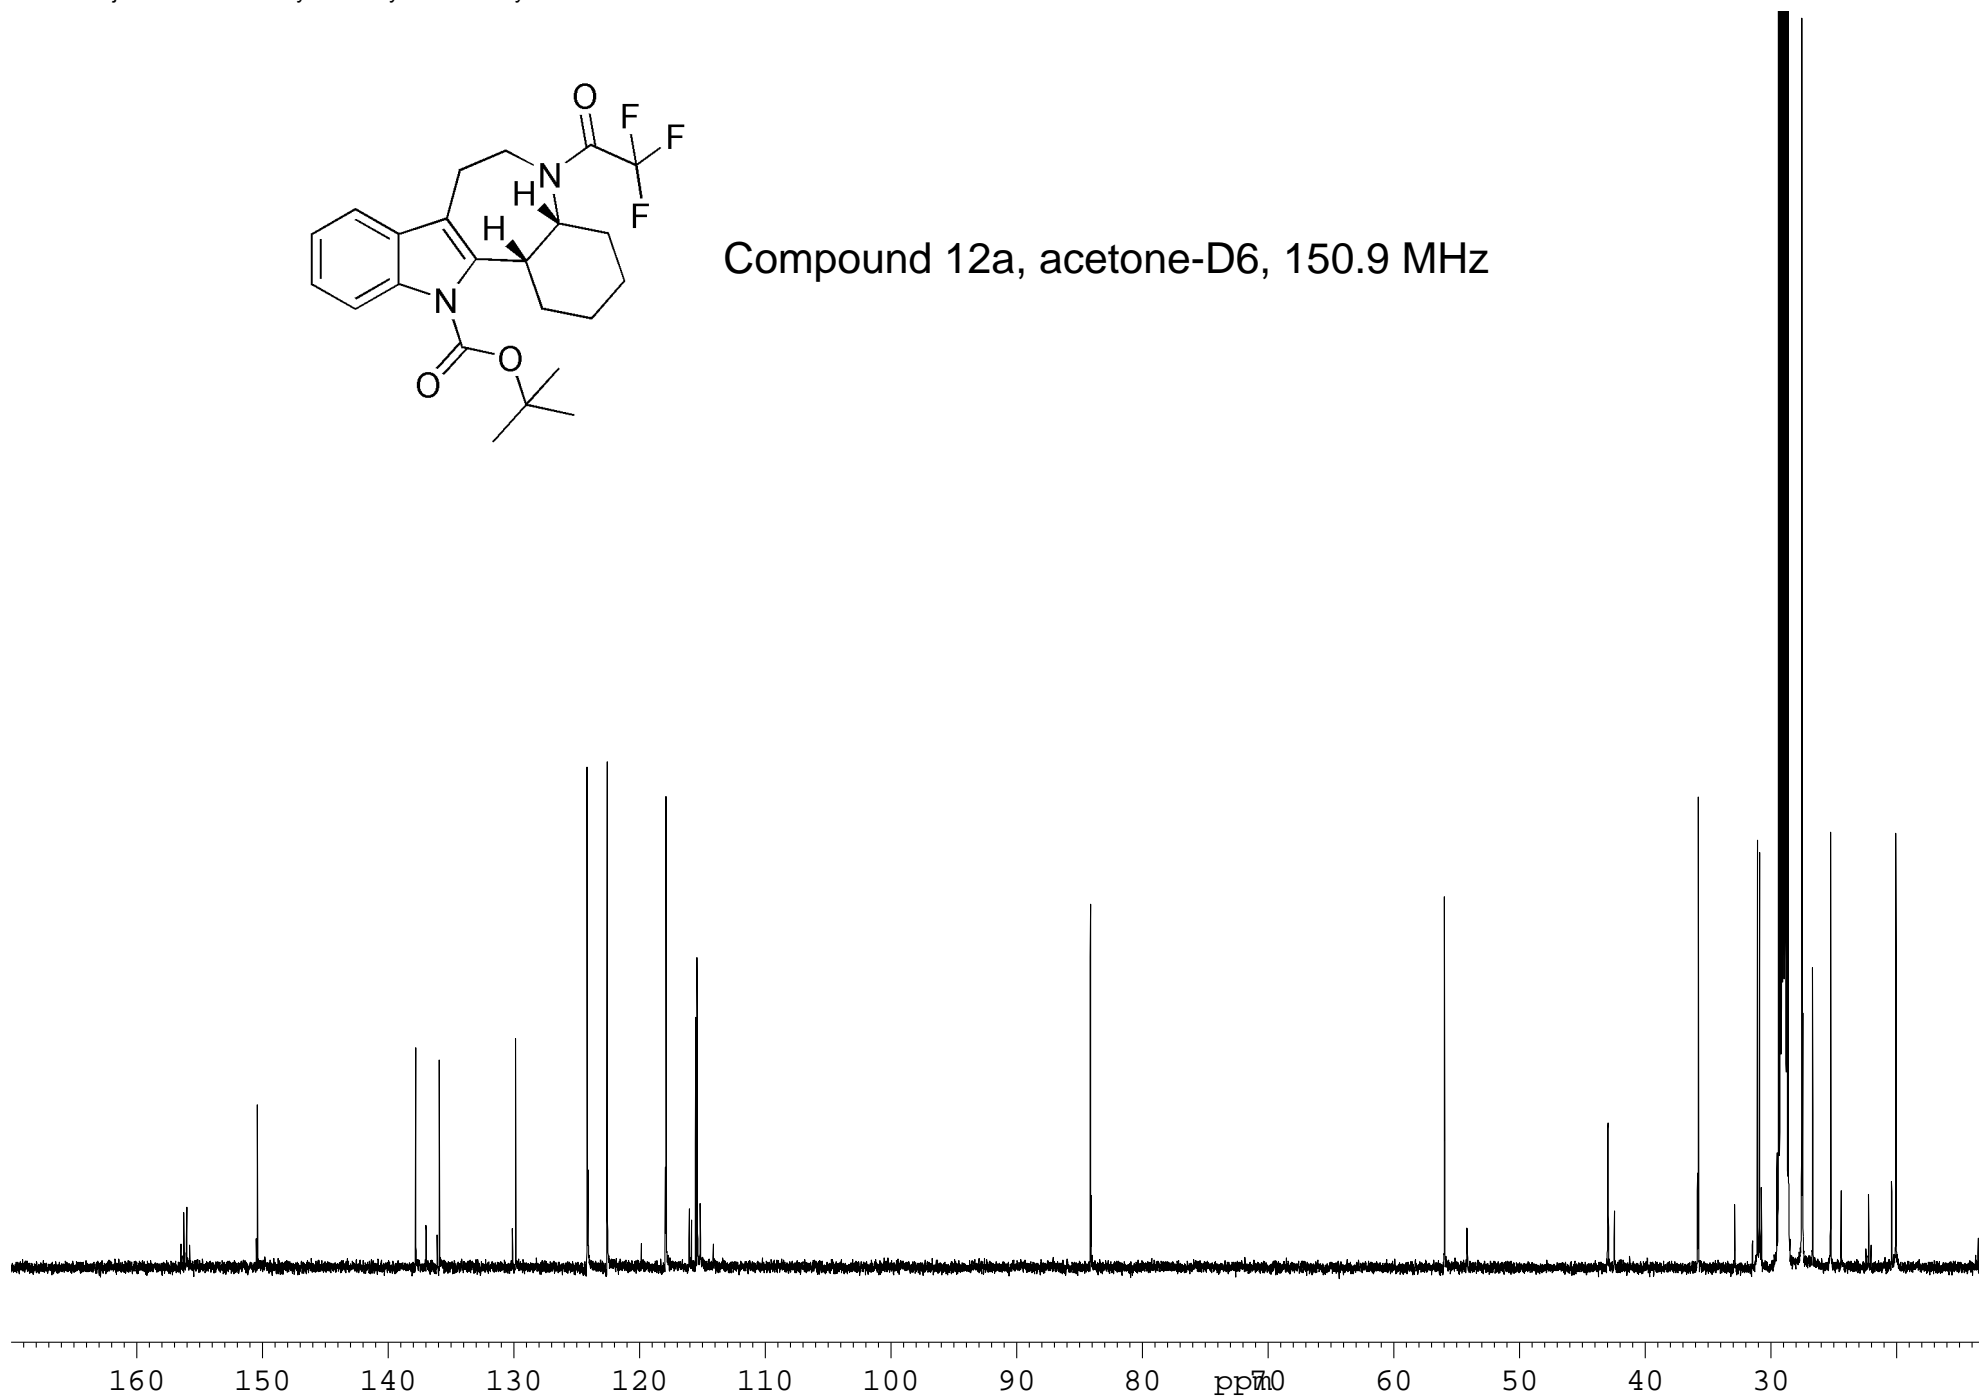

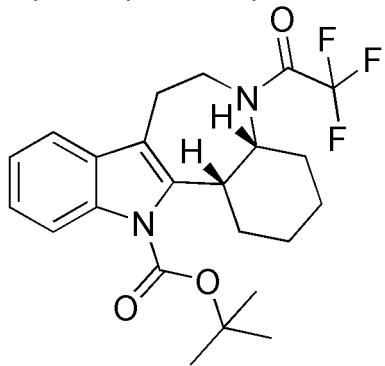

Compound 12a, acetone-D<sub>6</sub>, 600.13 MHz

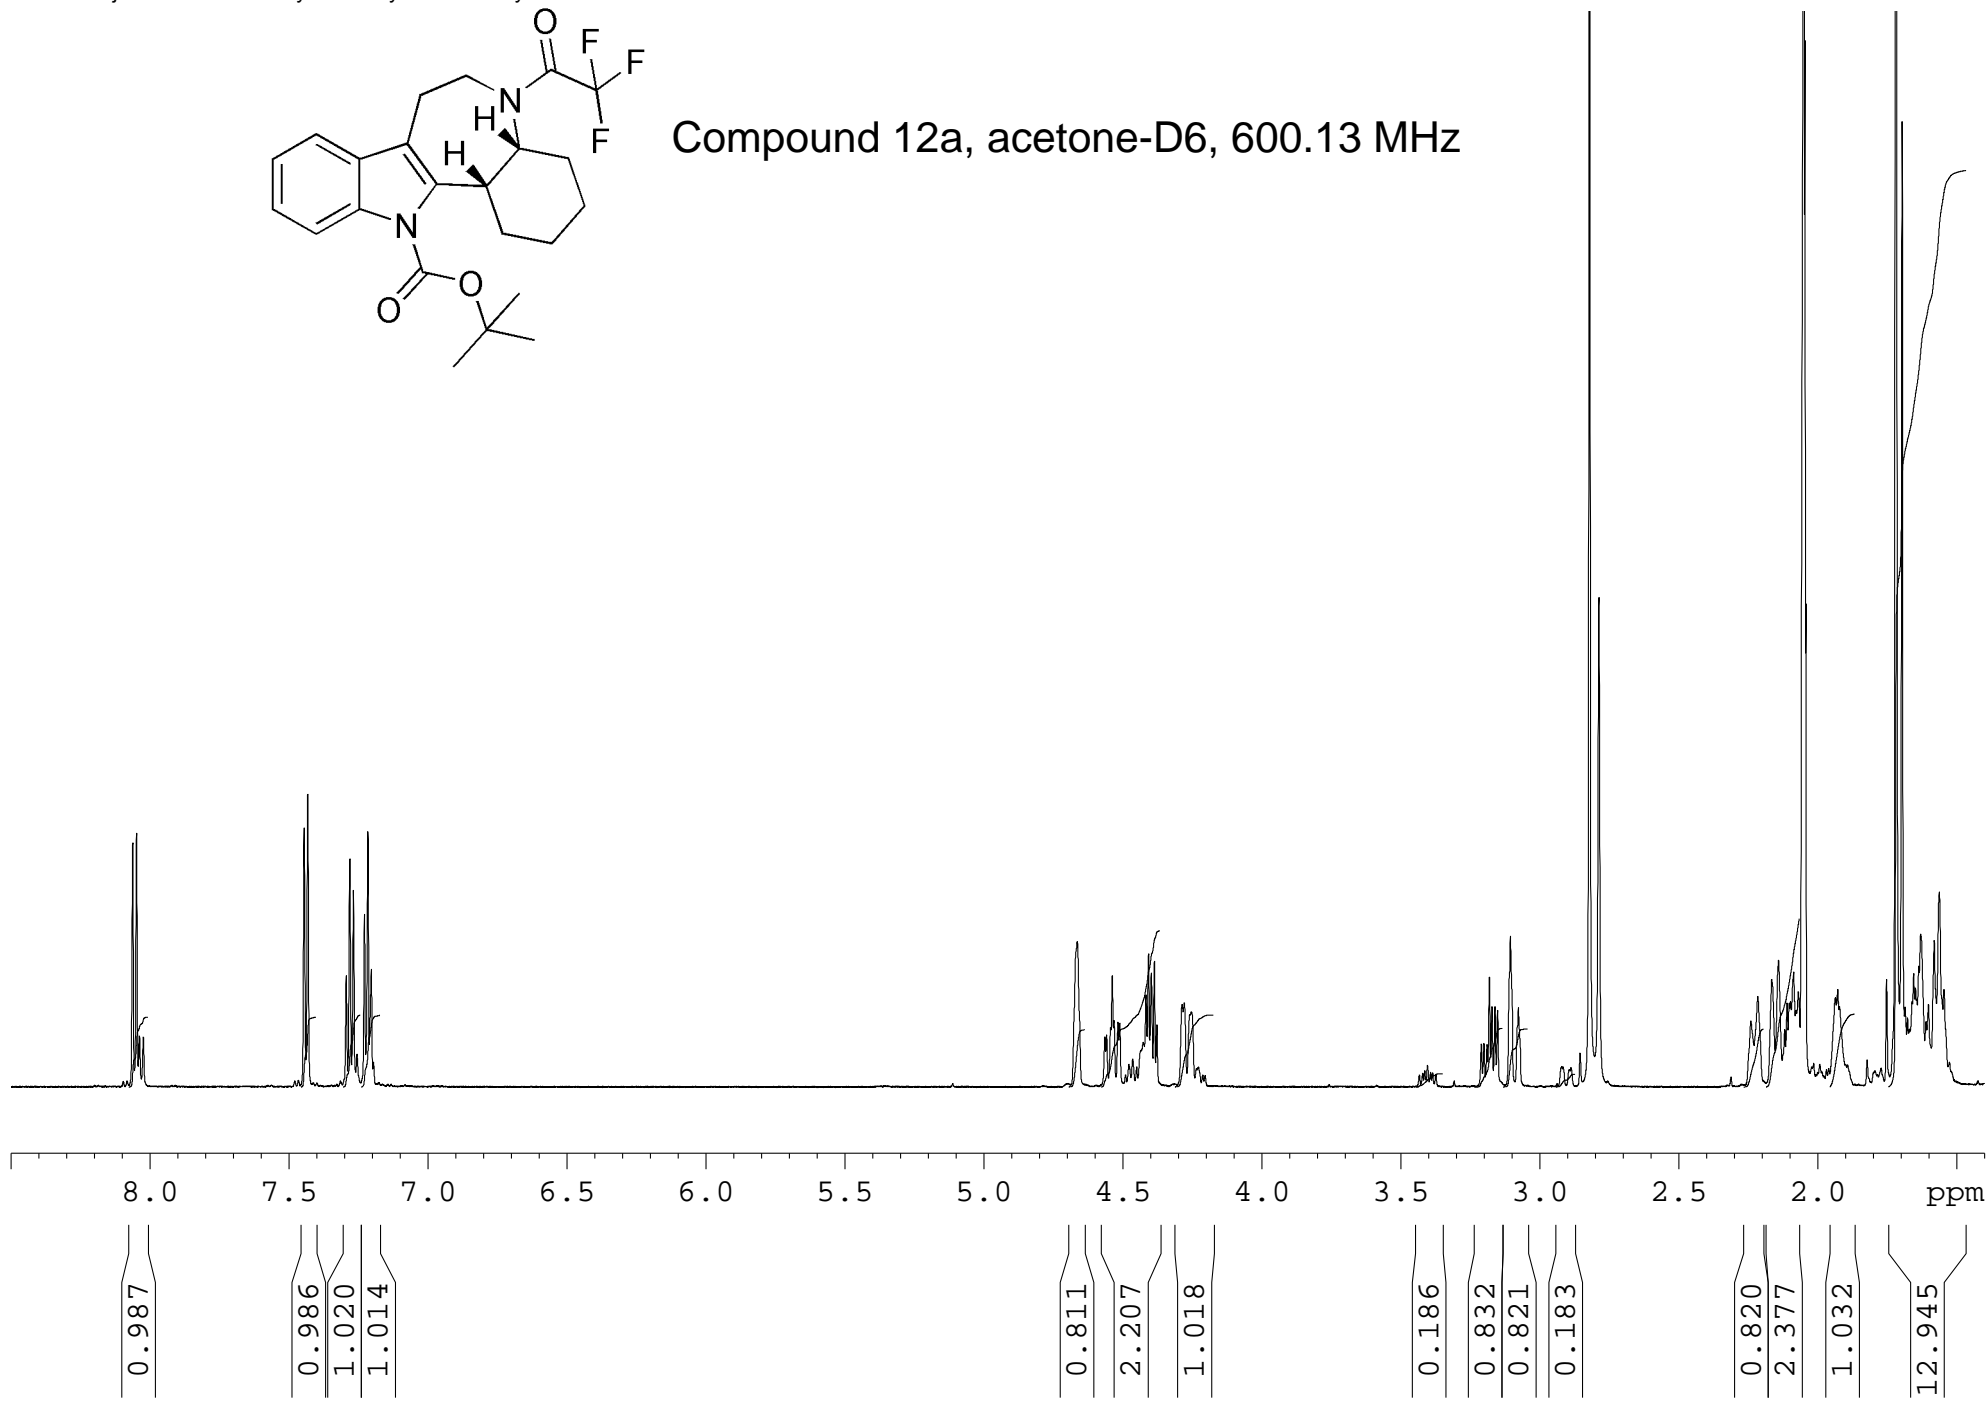

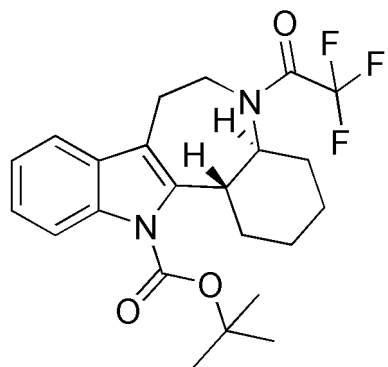

Compound 12b, acetone-D<sub>6</sub>, 150.9 MHz

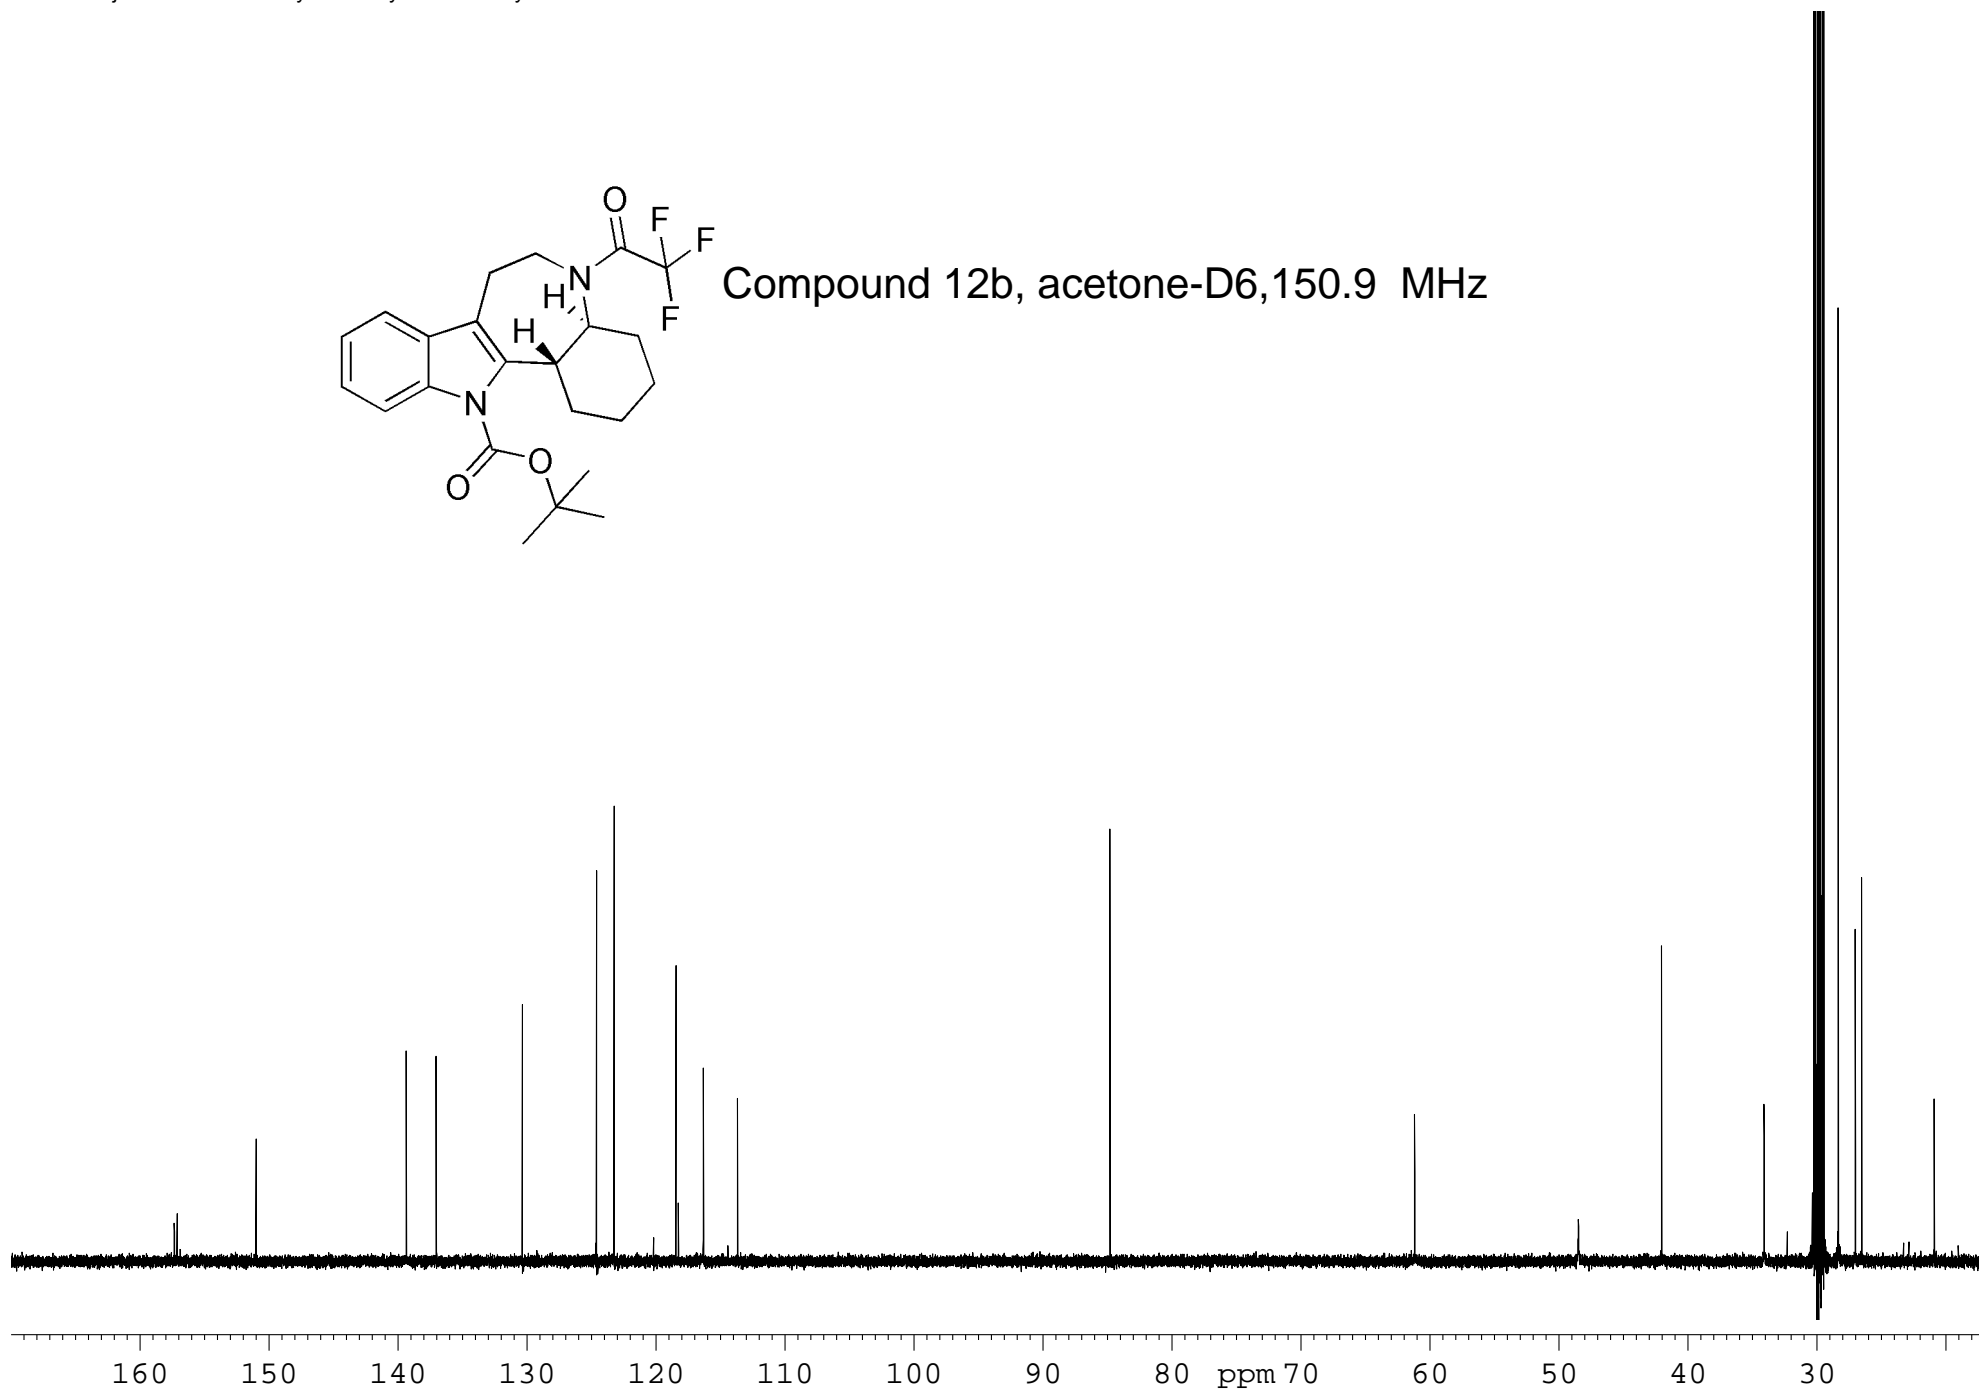



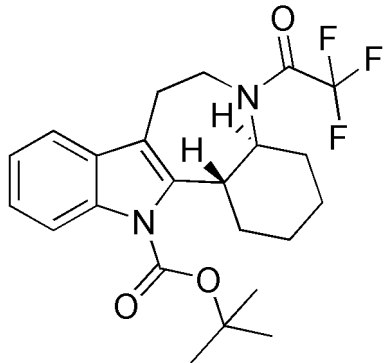

Compound 12b, acetone-D<sub>6</sub>, 600.13 MHz

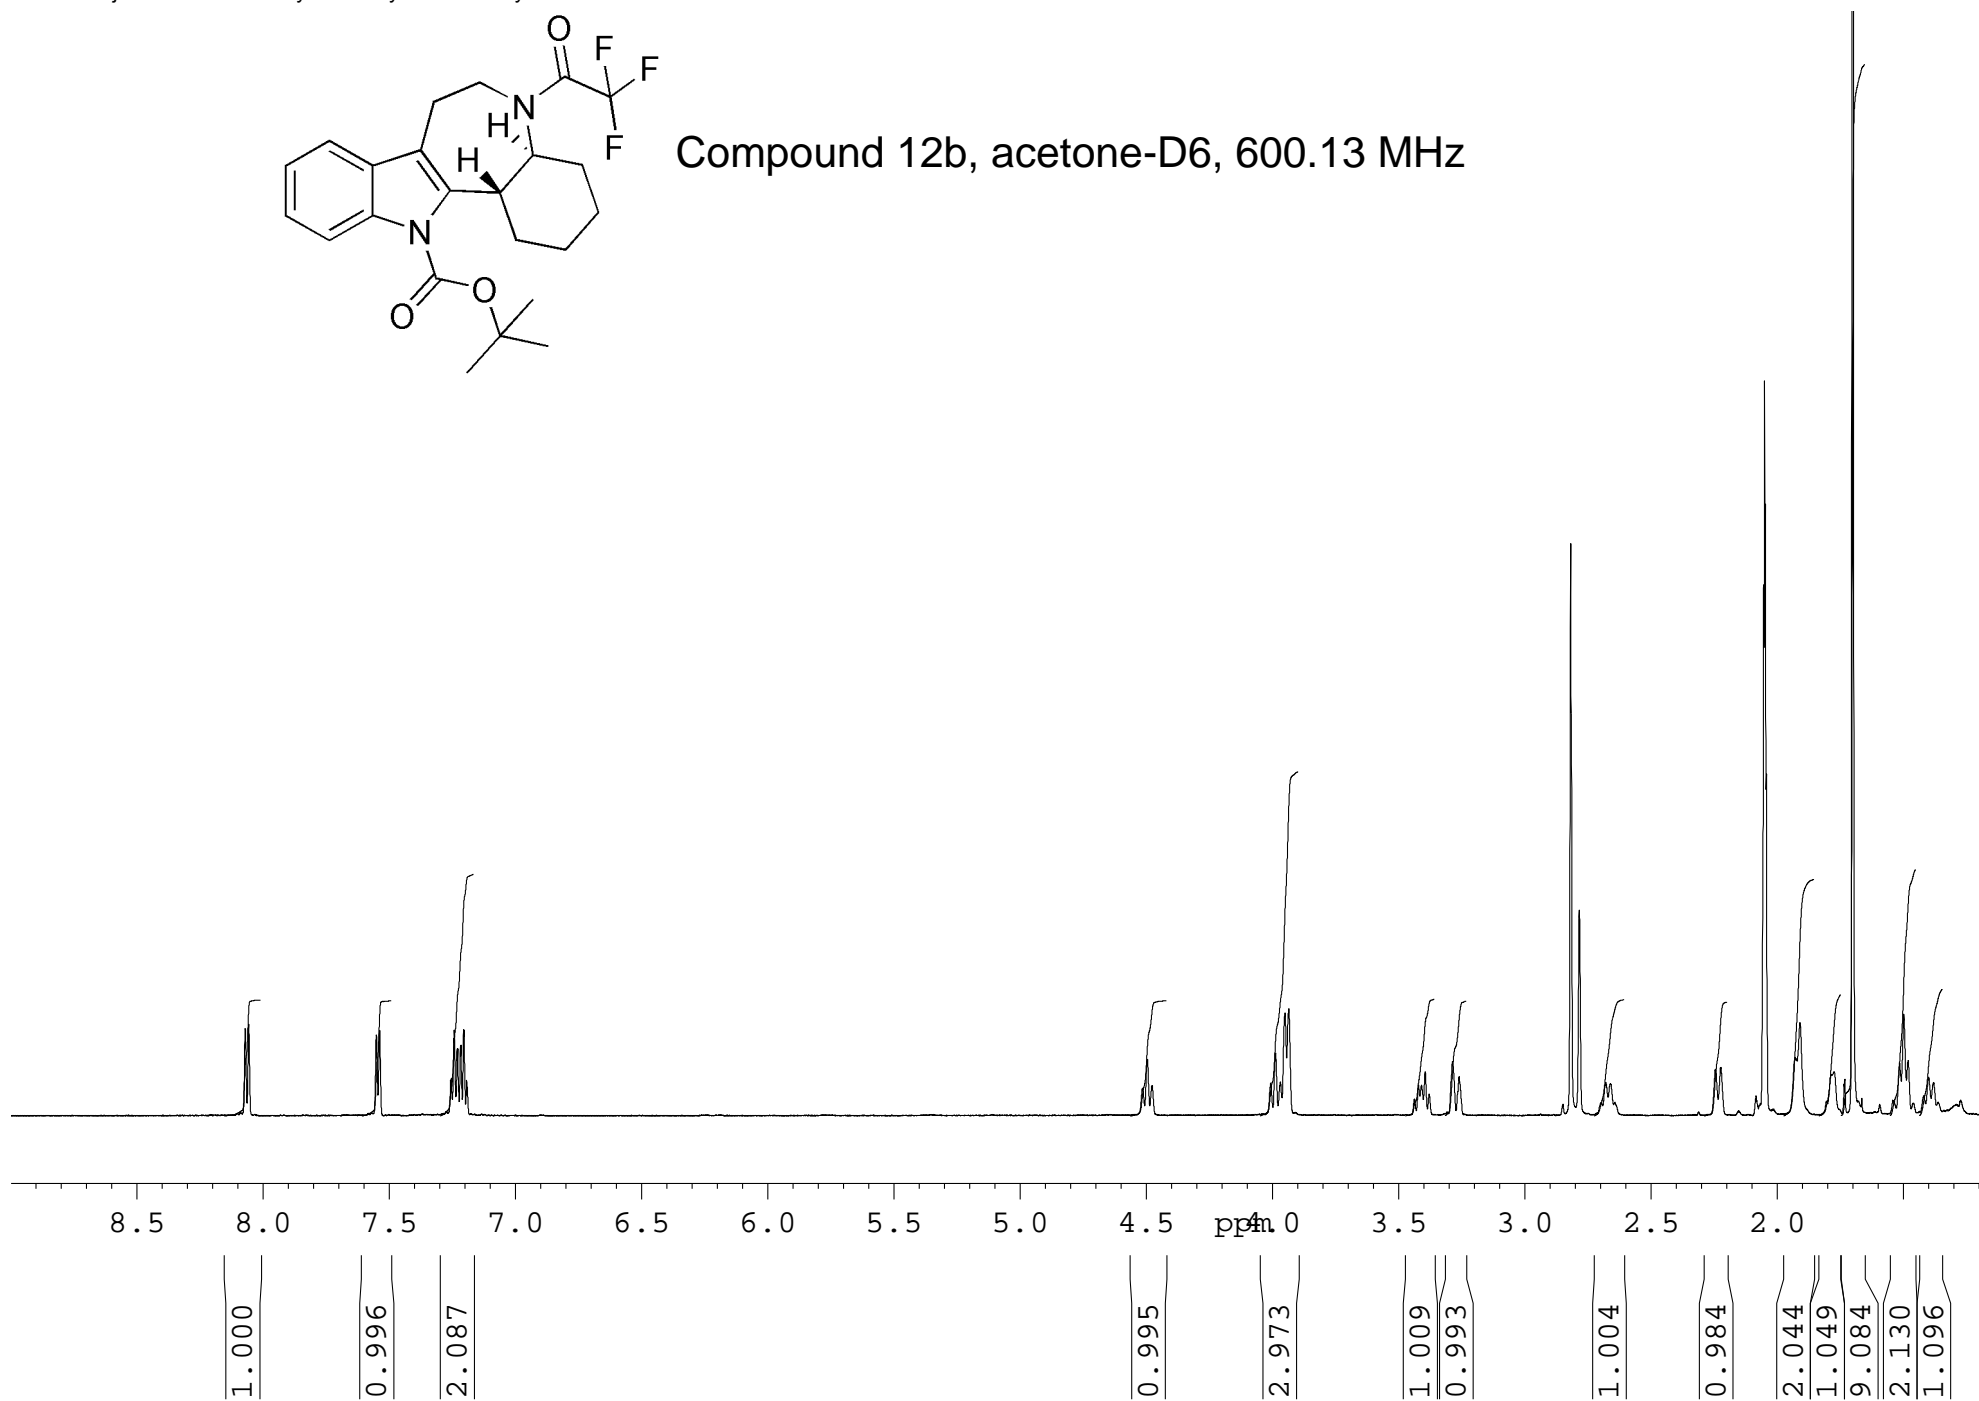

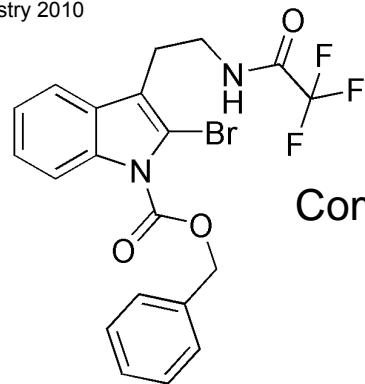

Compound 13, acetone-D<sub>6</sub>, 125.75 MHz

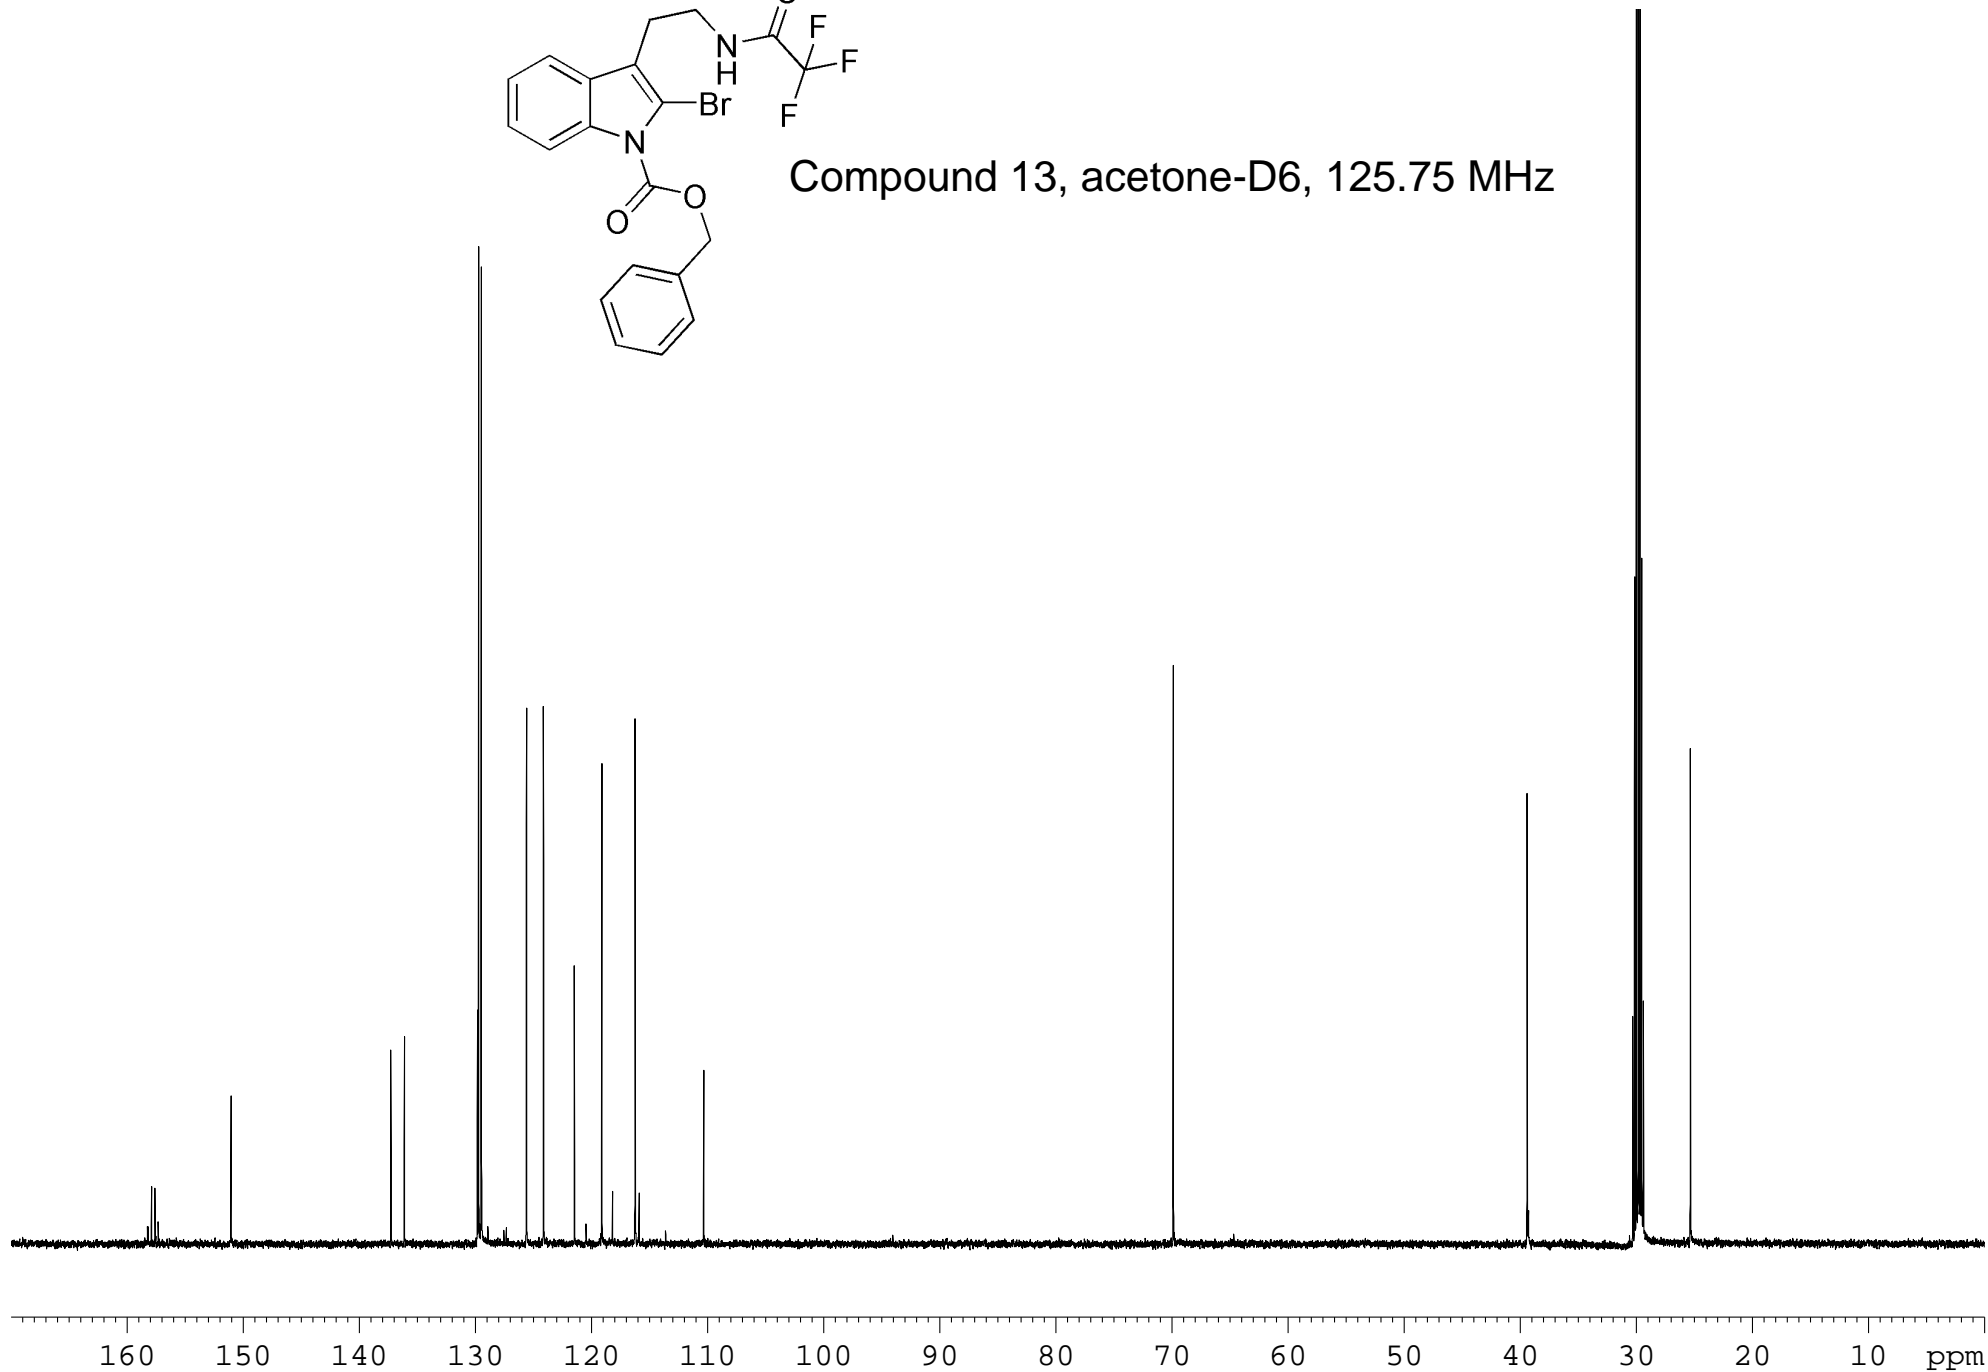

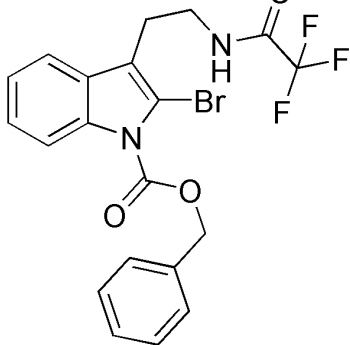

Compound 13, acetone-D6, 500.13 MHz

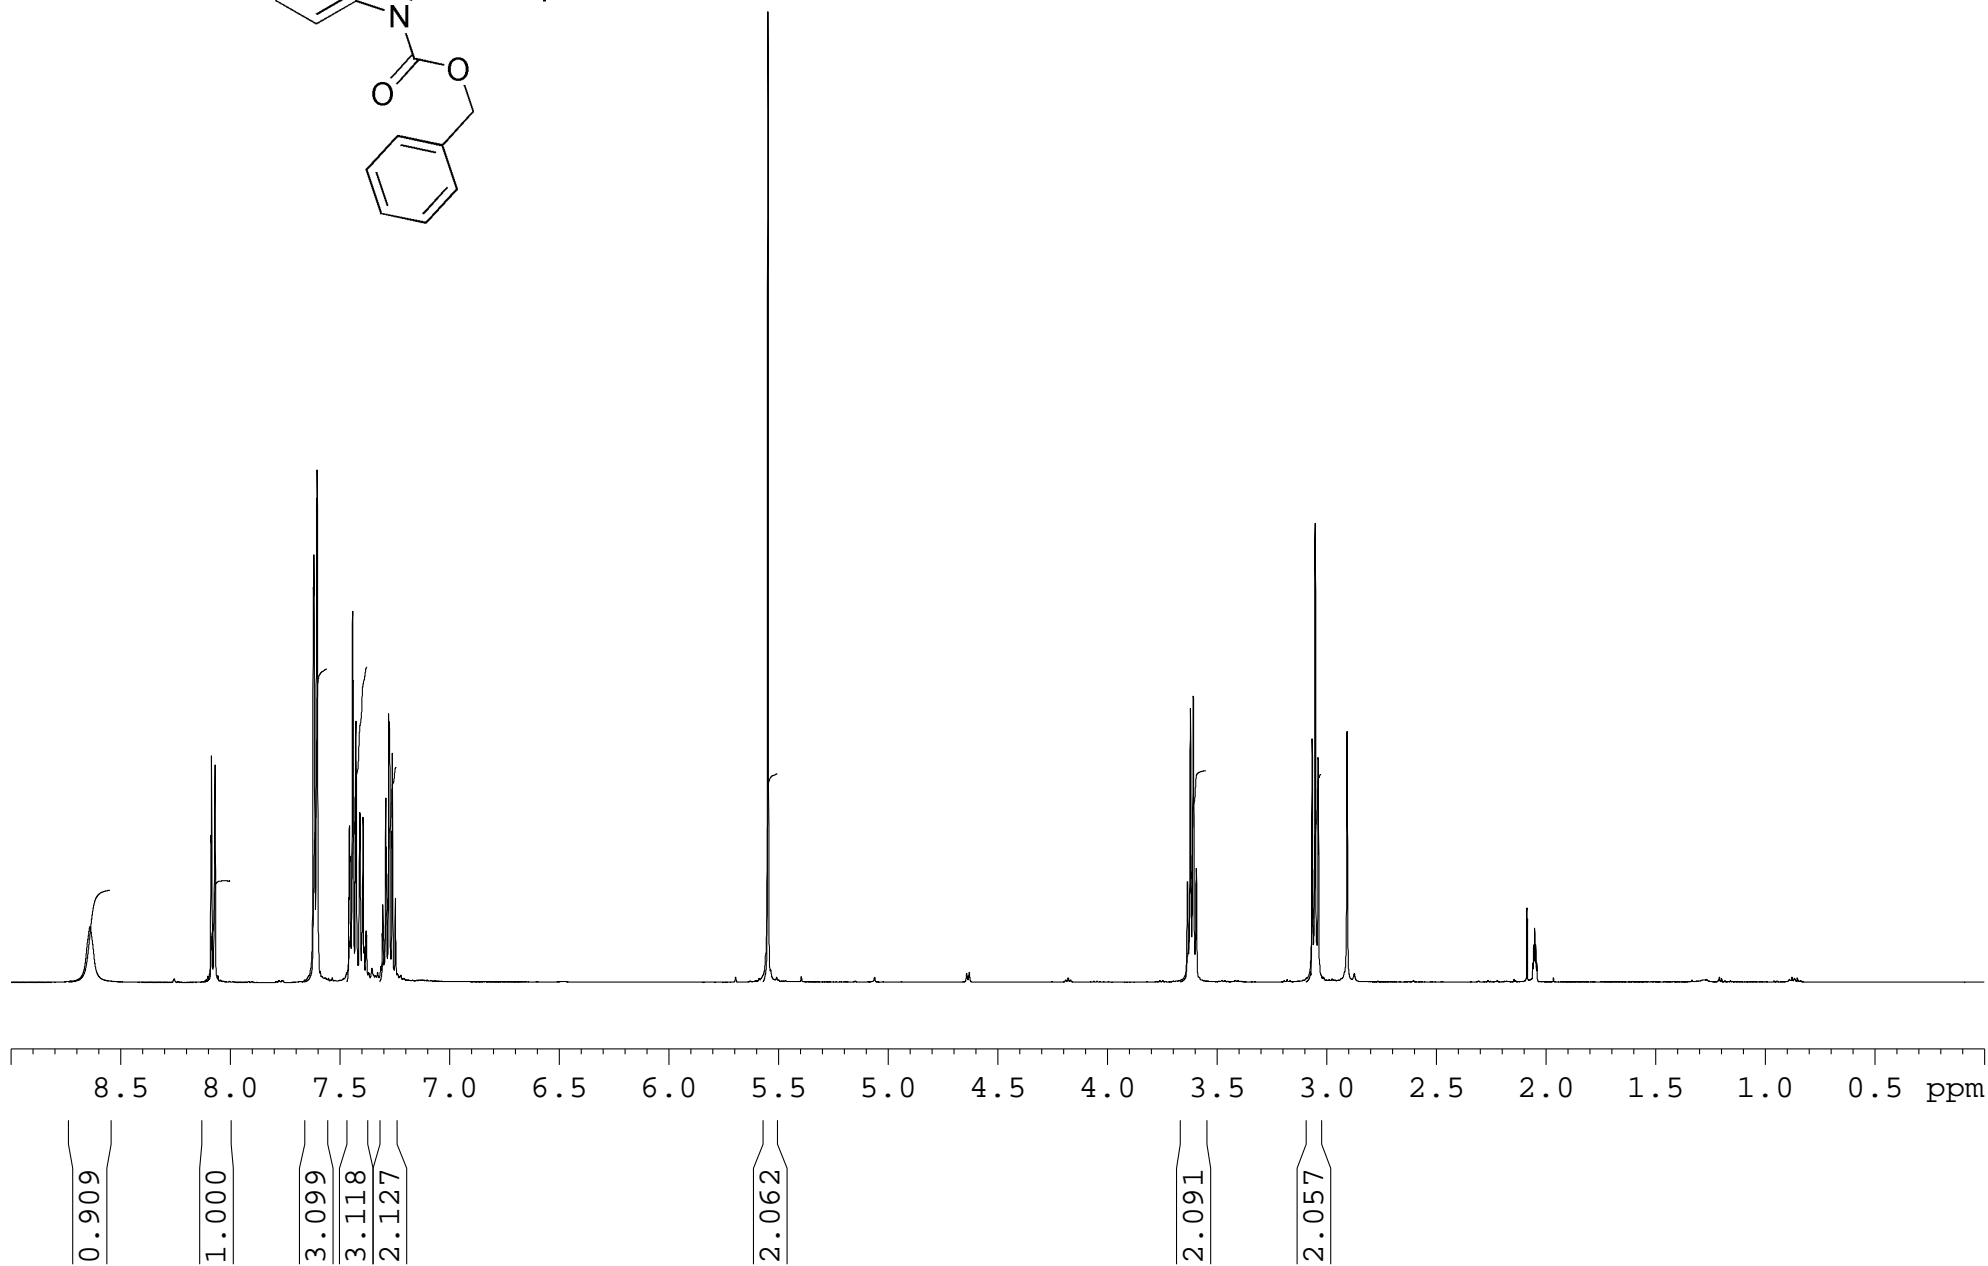

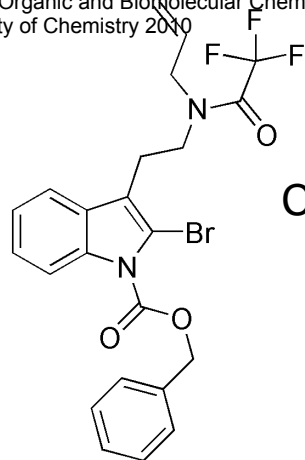

Compound 14, acetone-D6, 125.75 MHz

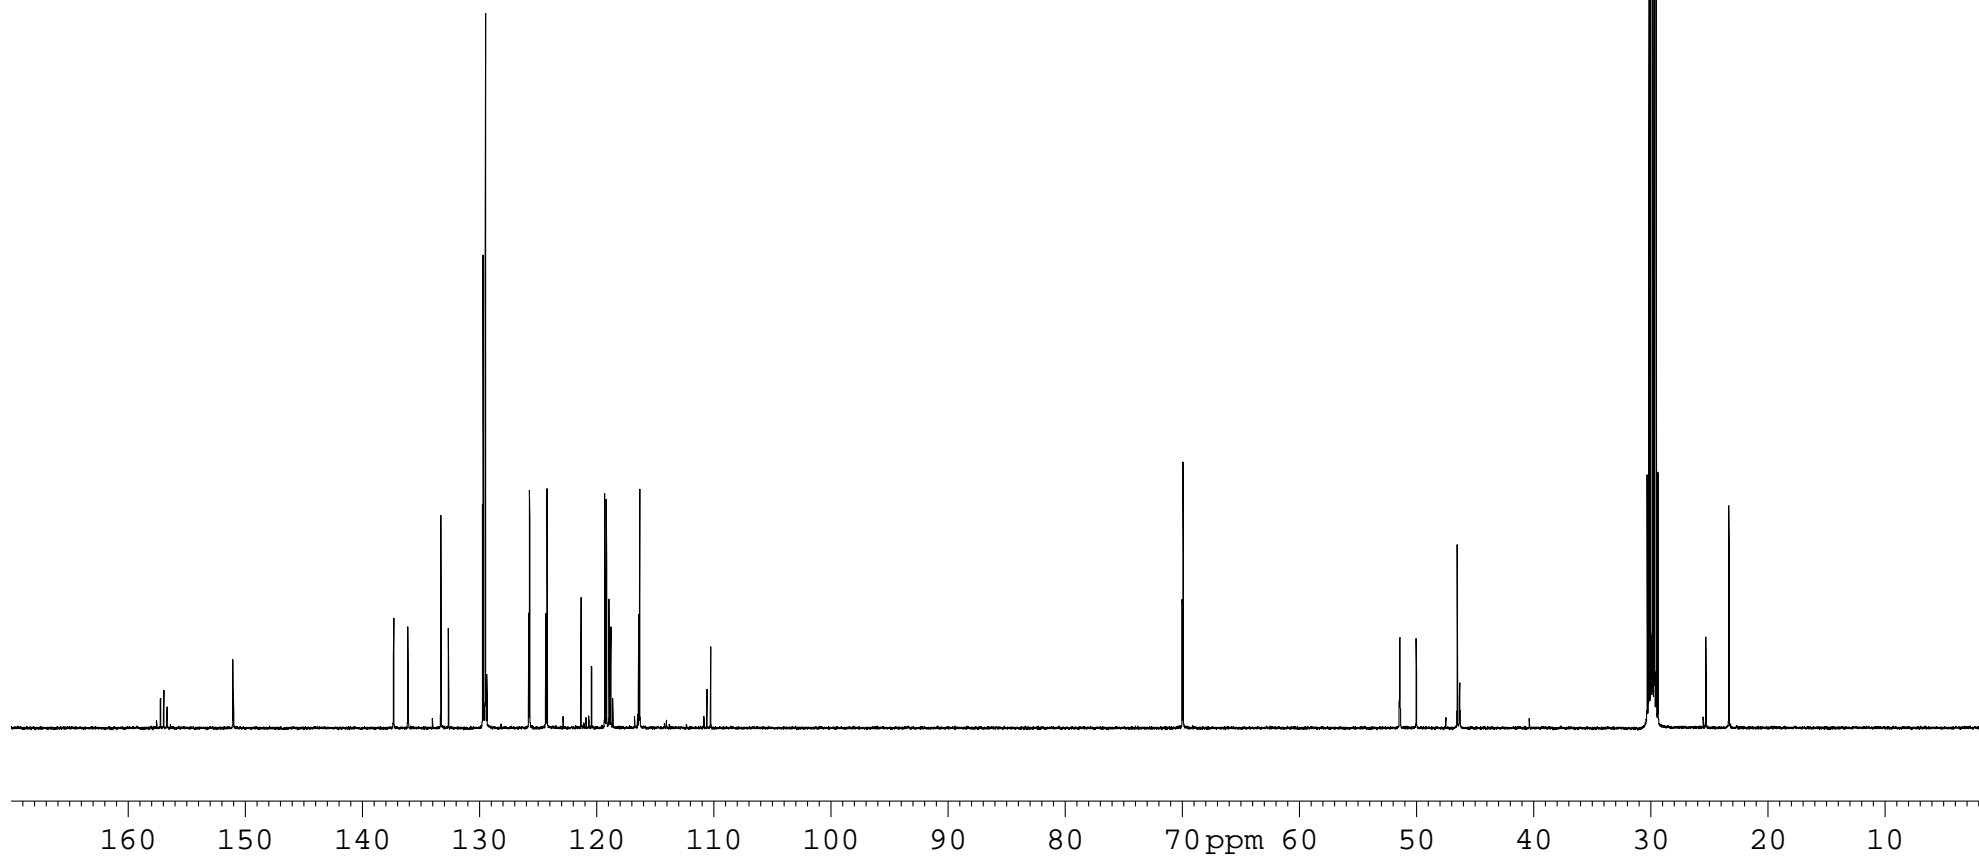

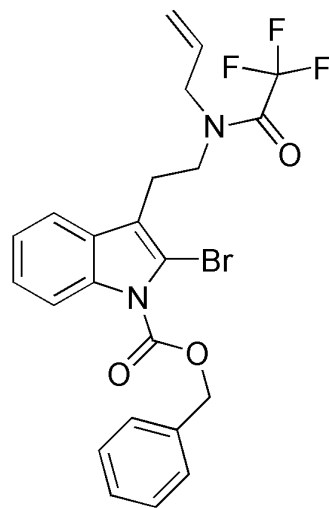

Compound 14, acetone-D<sub>6</sub>, 500.13 MHz

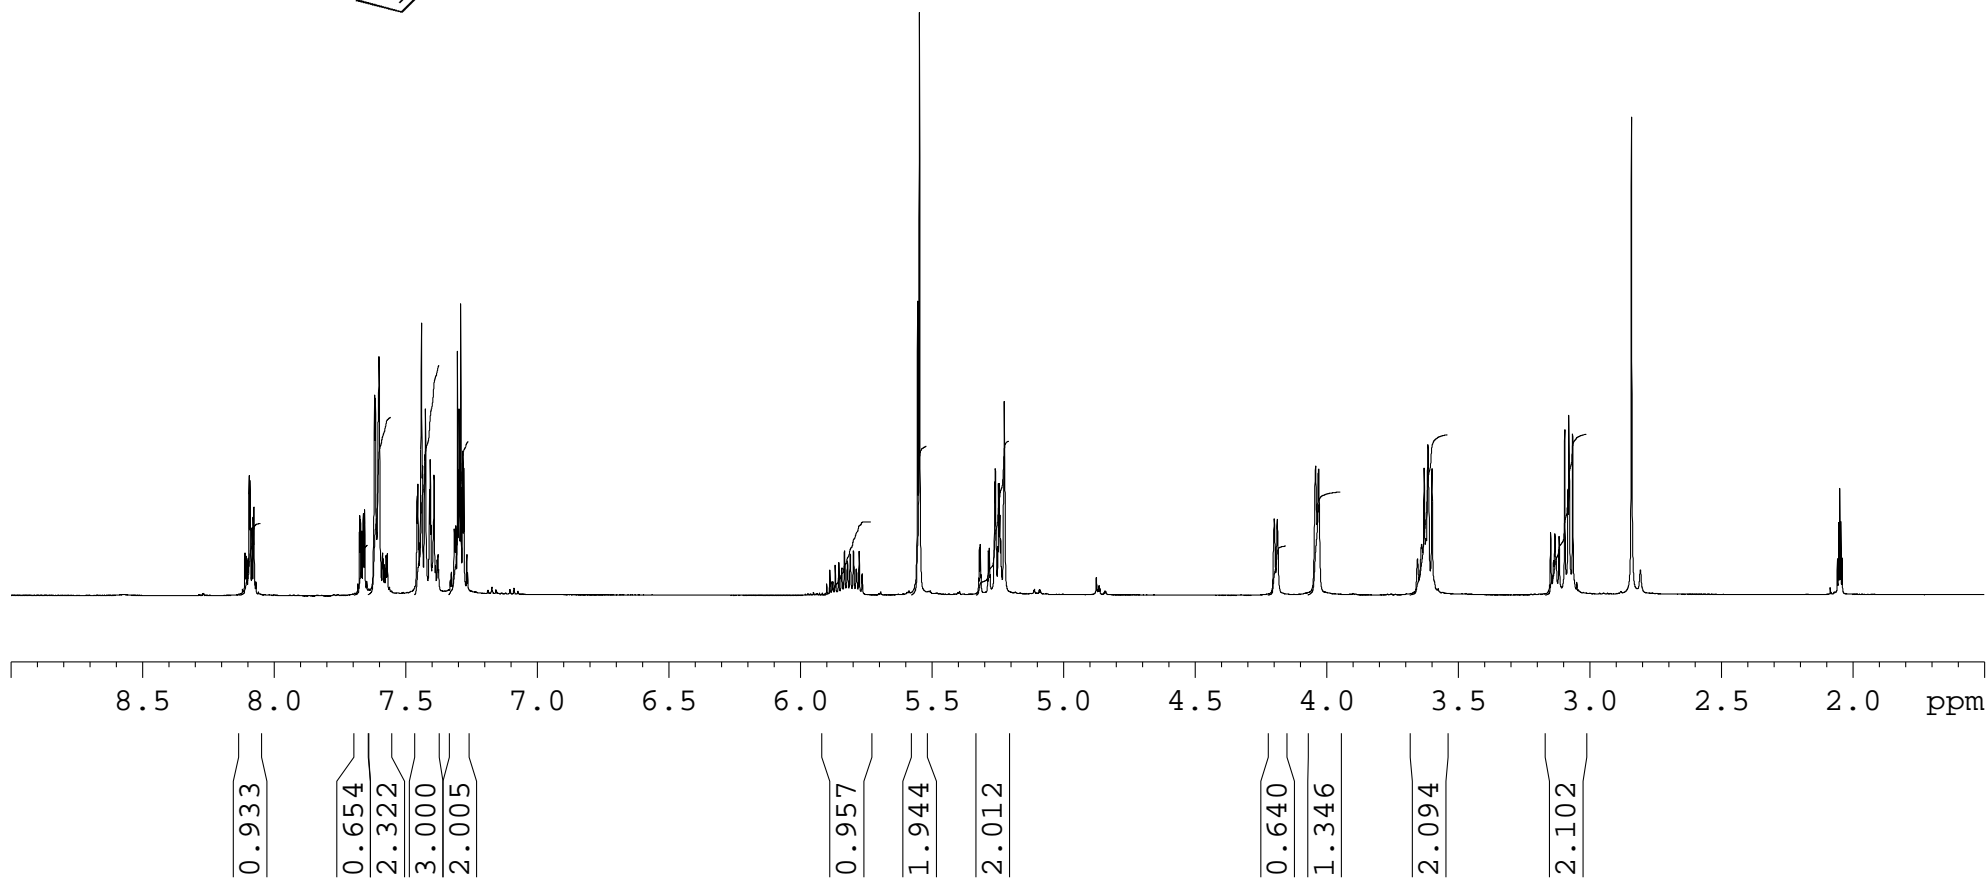

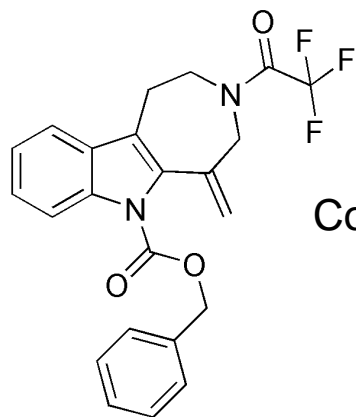

Compound 15, acetone-D6, 150.9 MHz

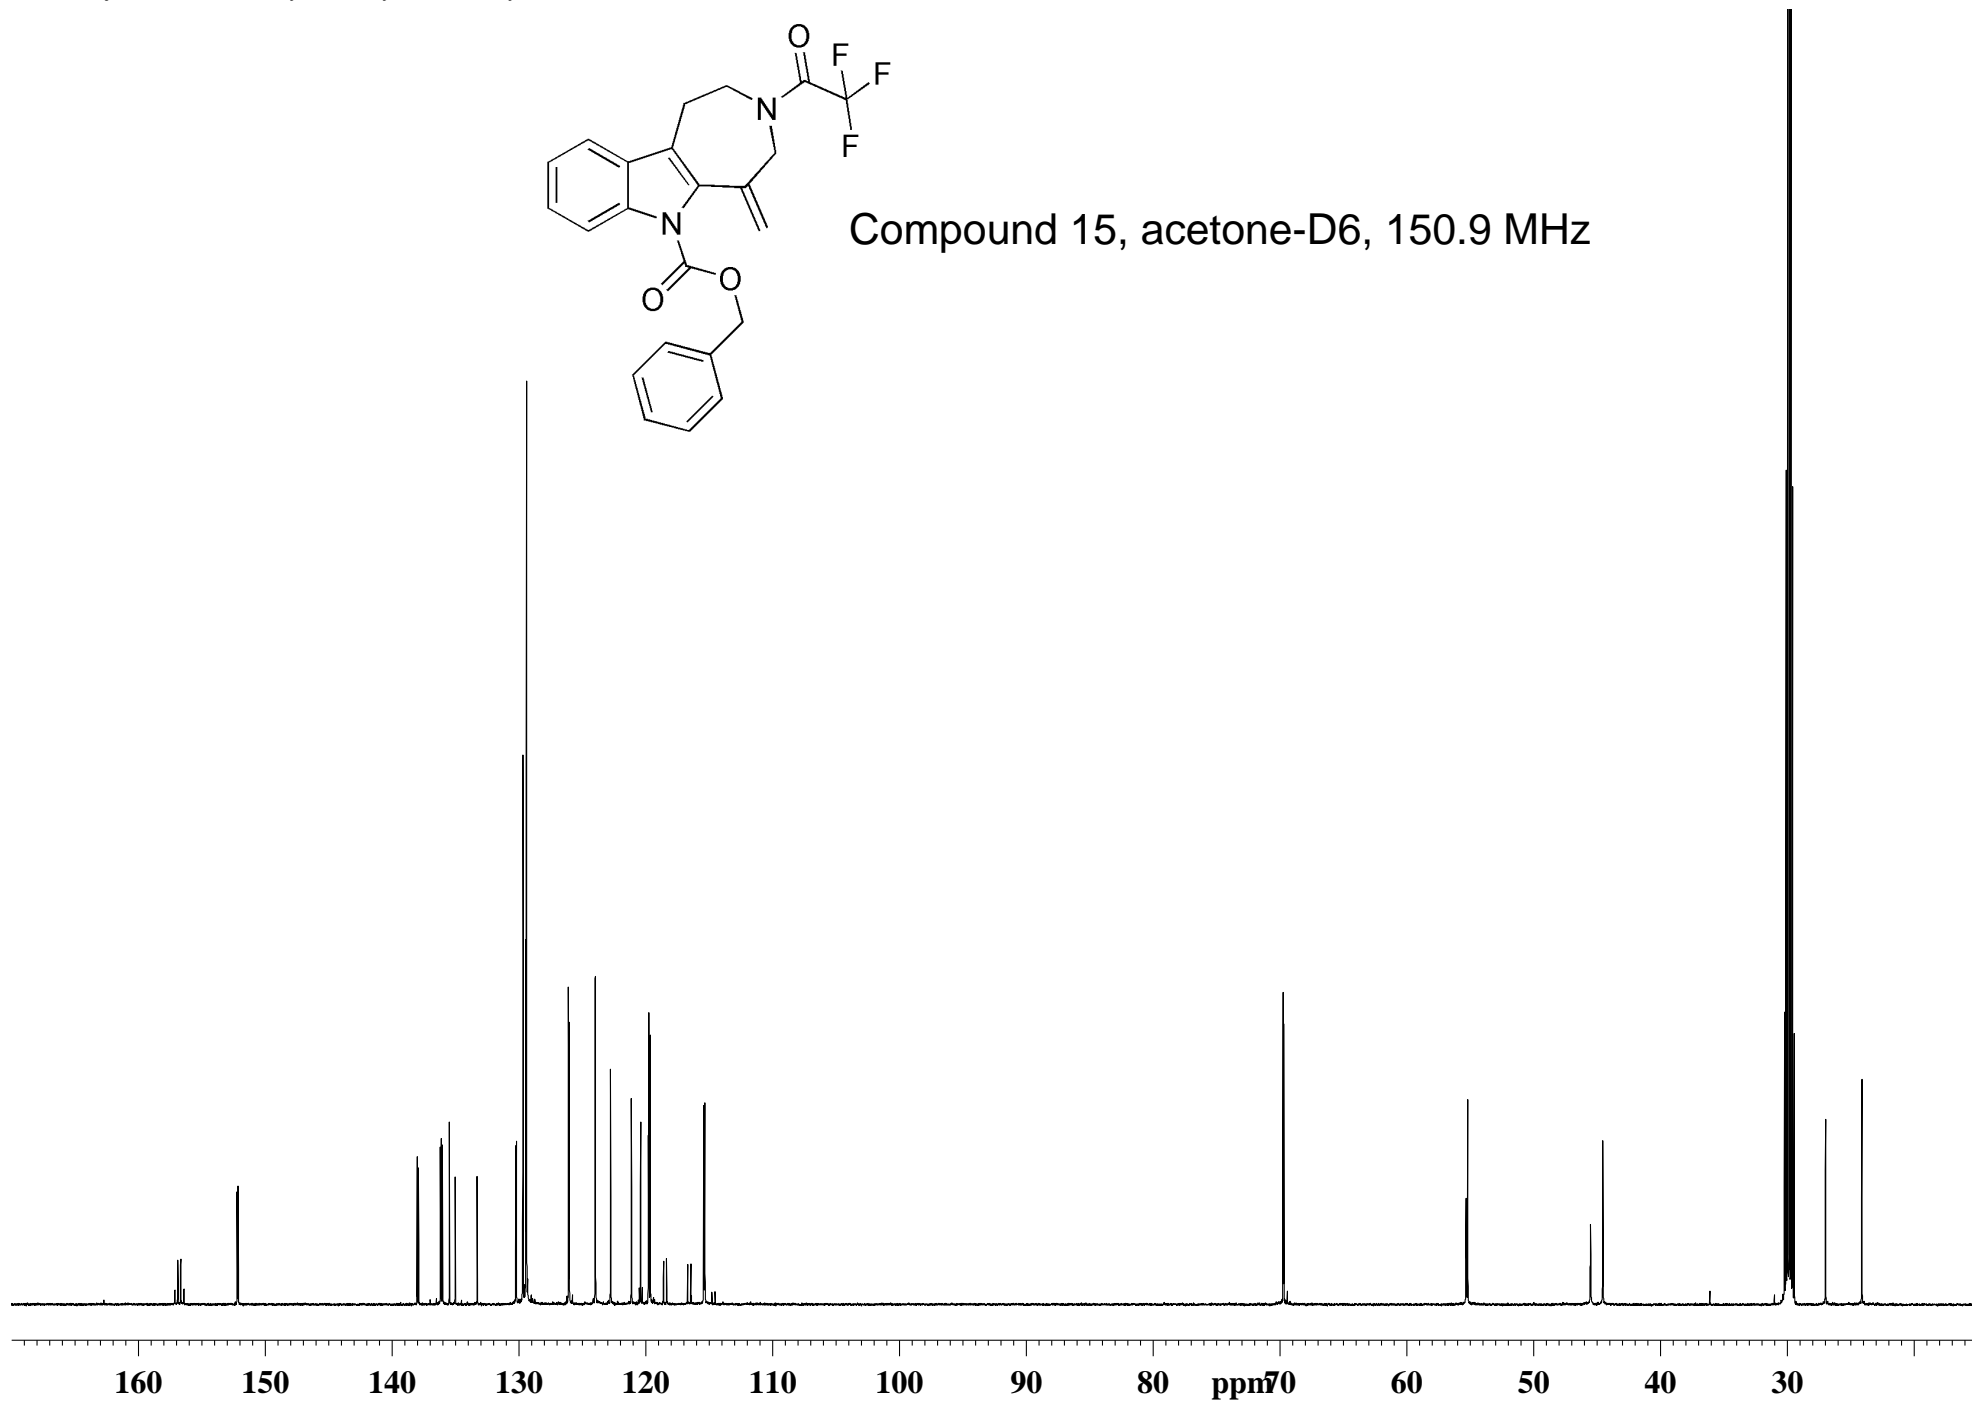

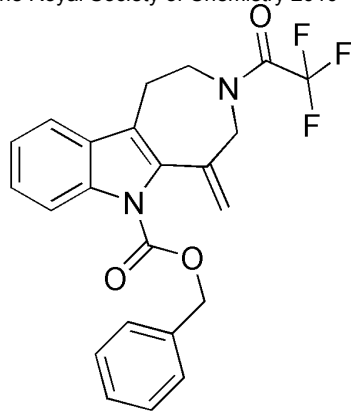

Compound 15, acetone-D<sub>6</sub>, 600.13 MHz

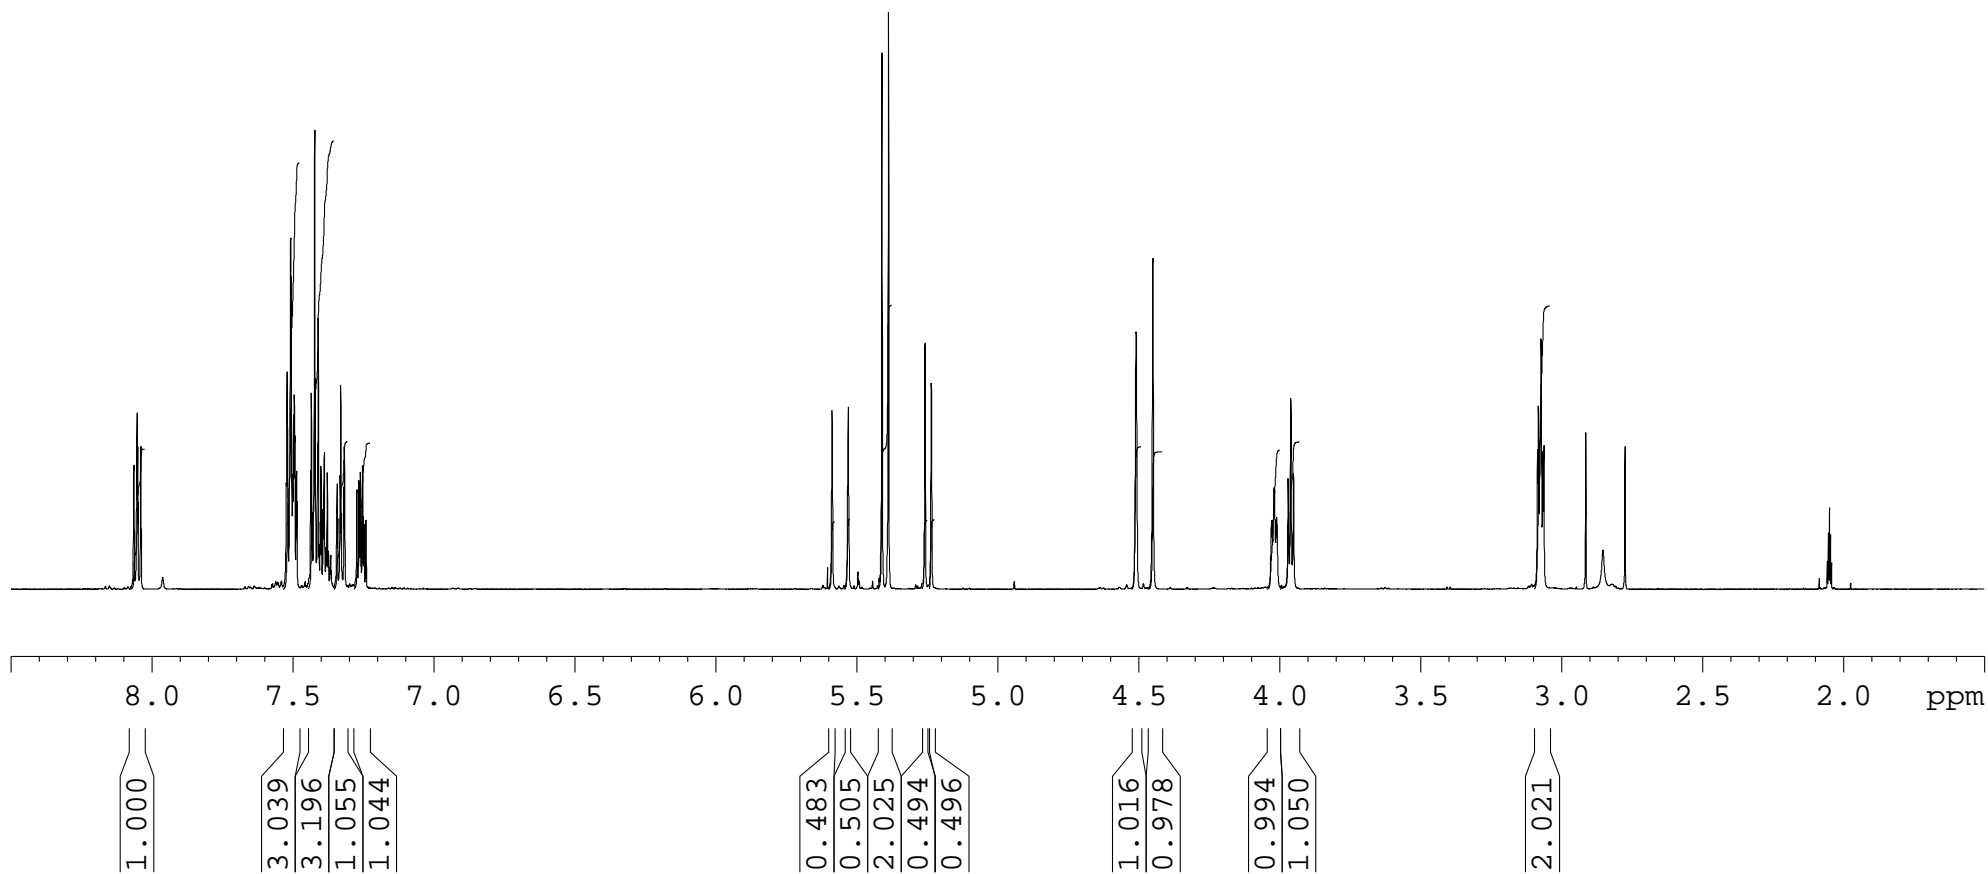

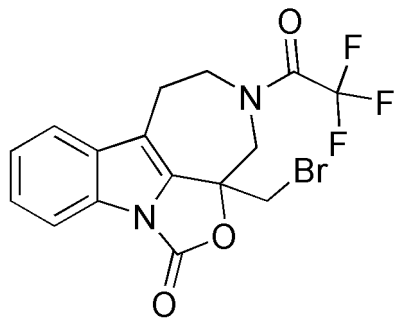

Compound 16, CDCl<sub>3</sub>, 150.9 MHz

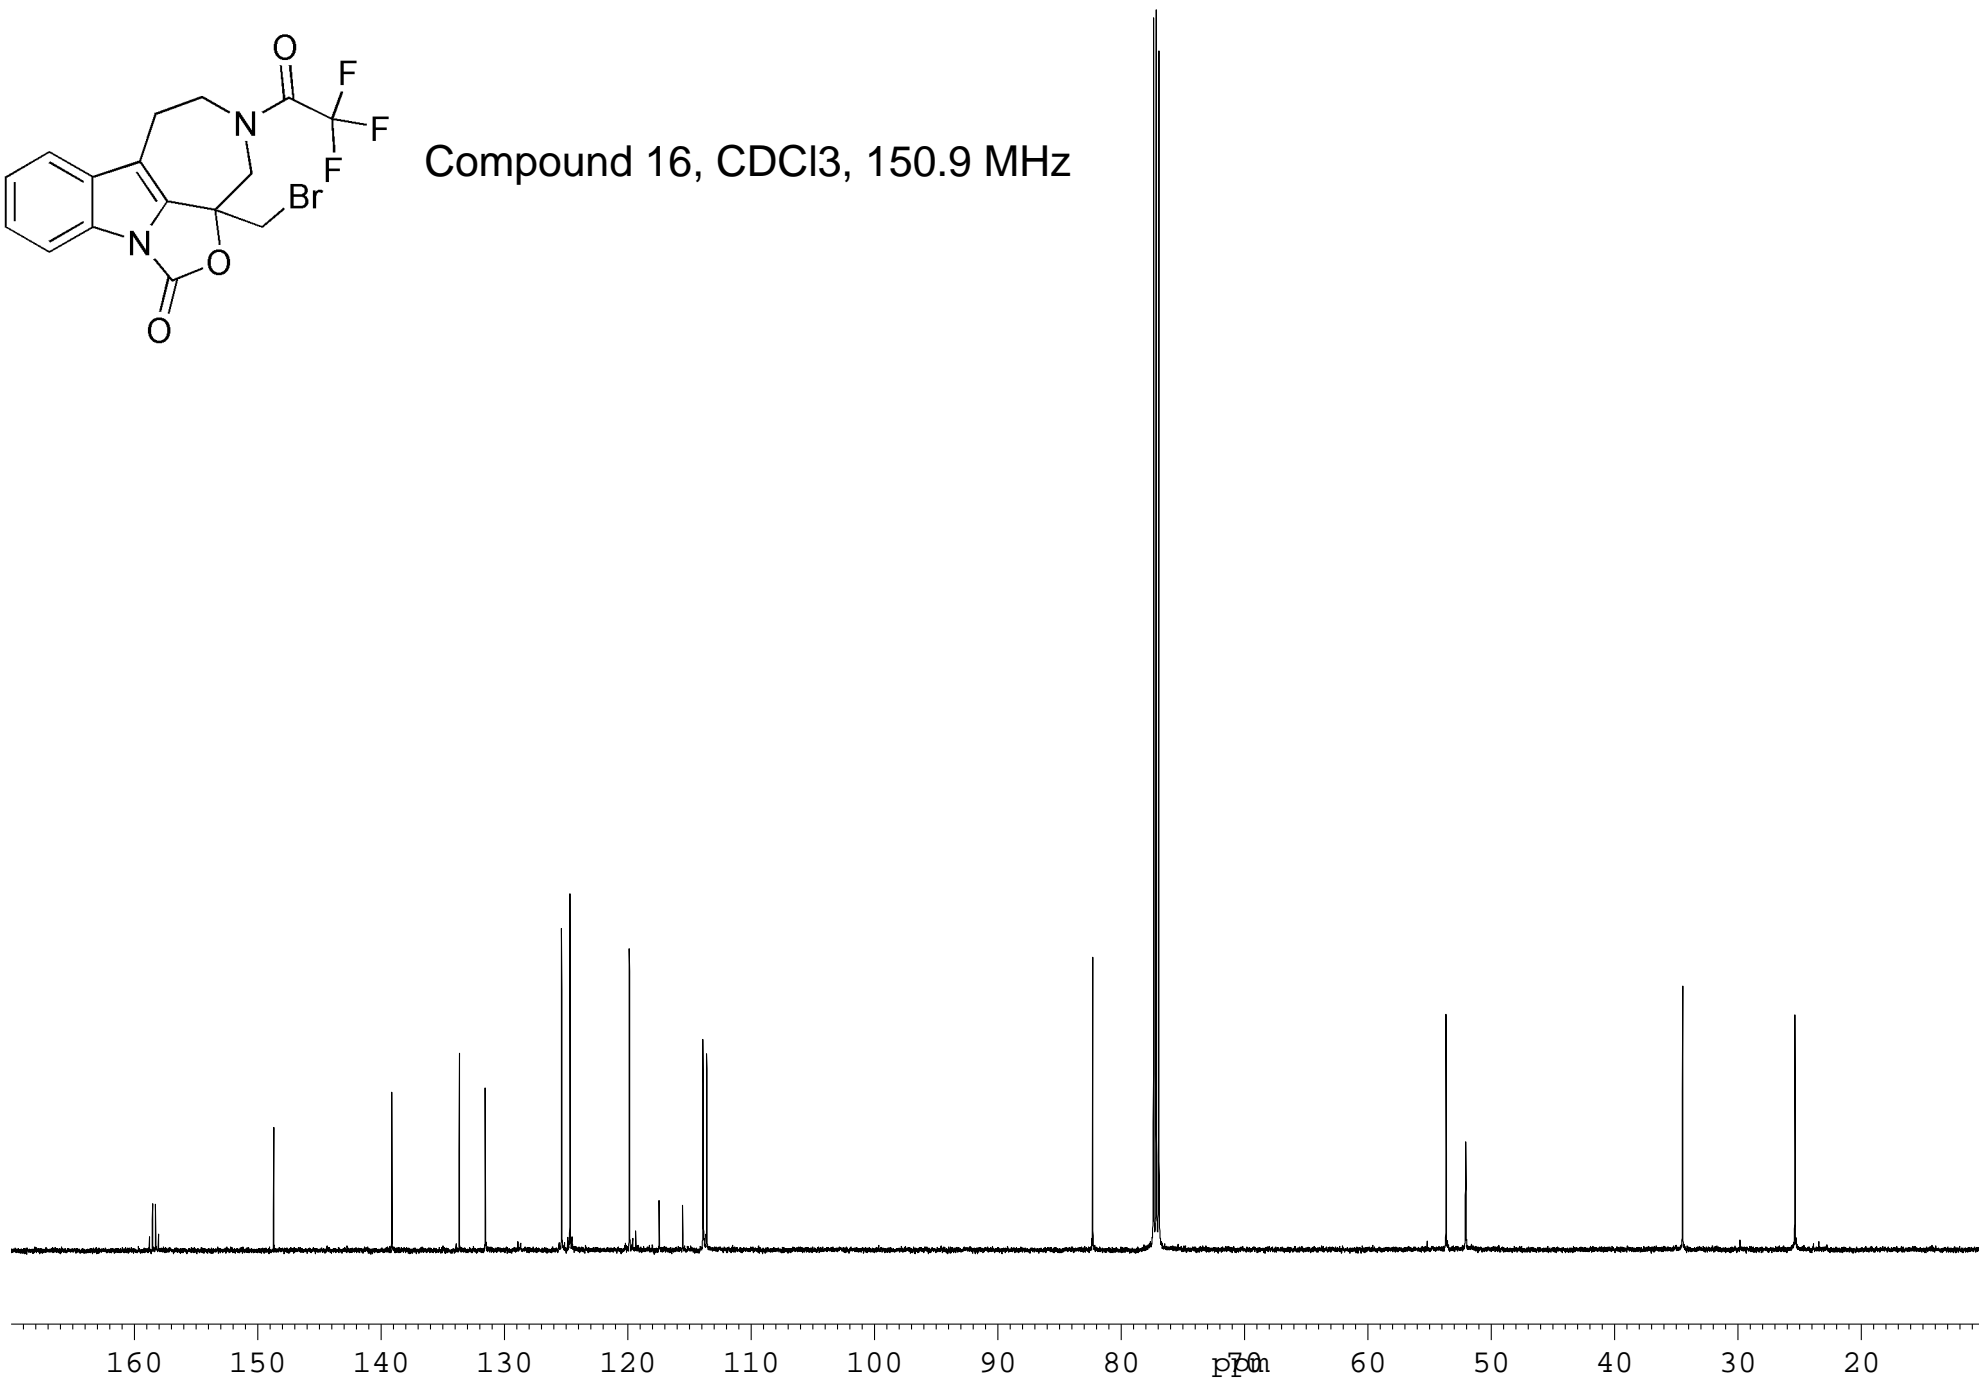



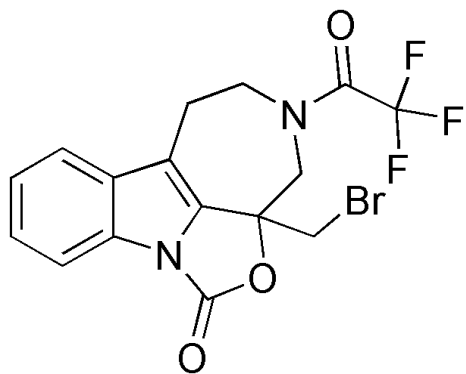

Compound 16, CDCl<sub>3</sub>, 600.13 MHz

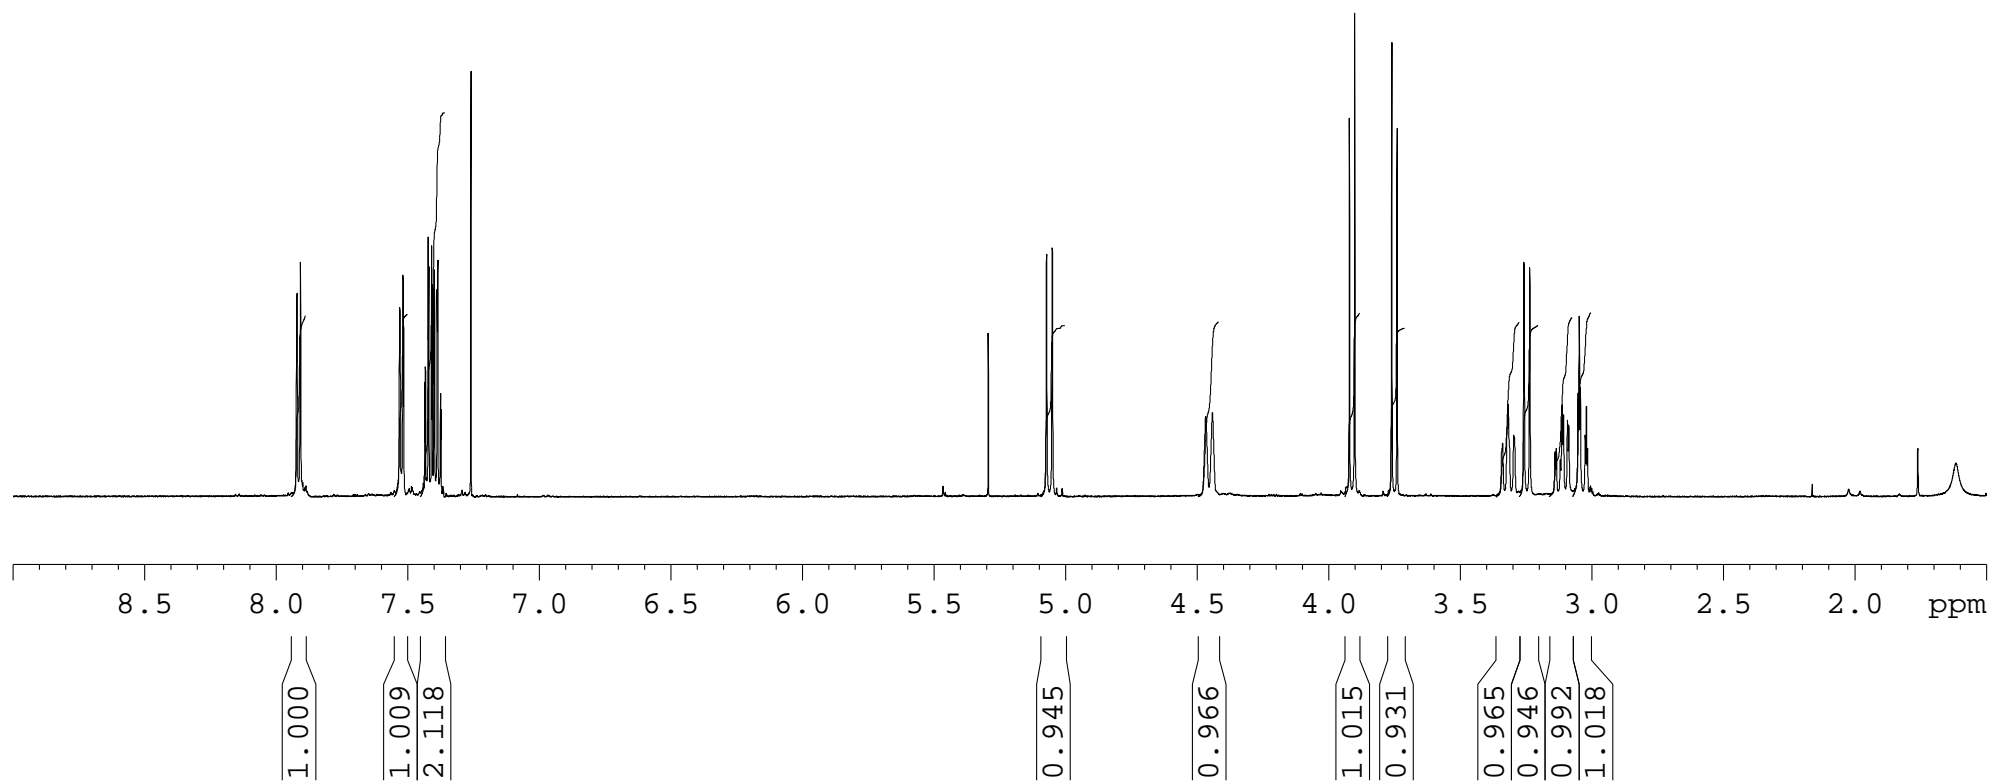

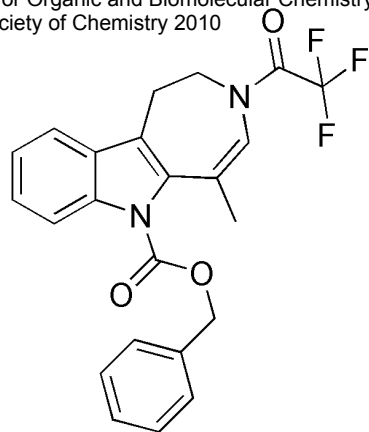

Compound 17, CDCl<sub>3</sub>, 150.9 MHz

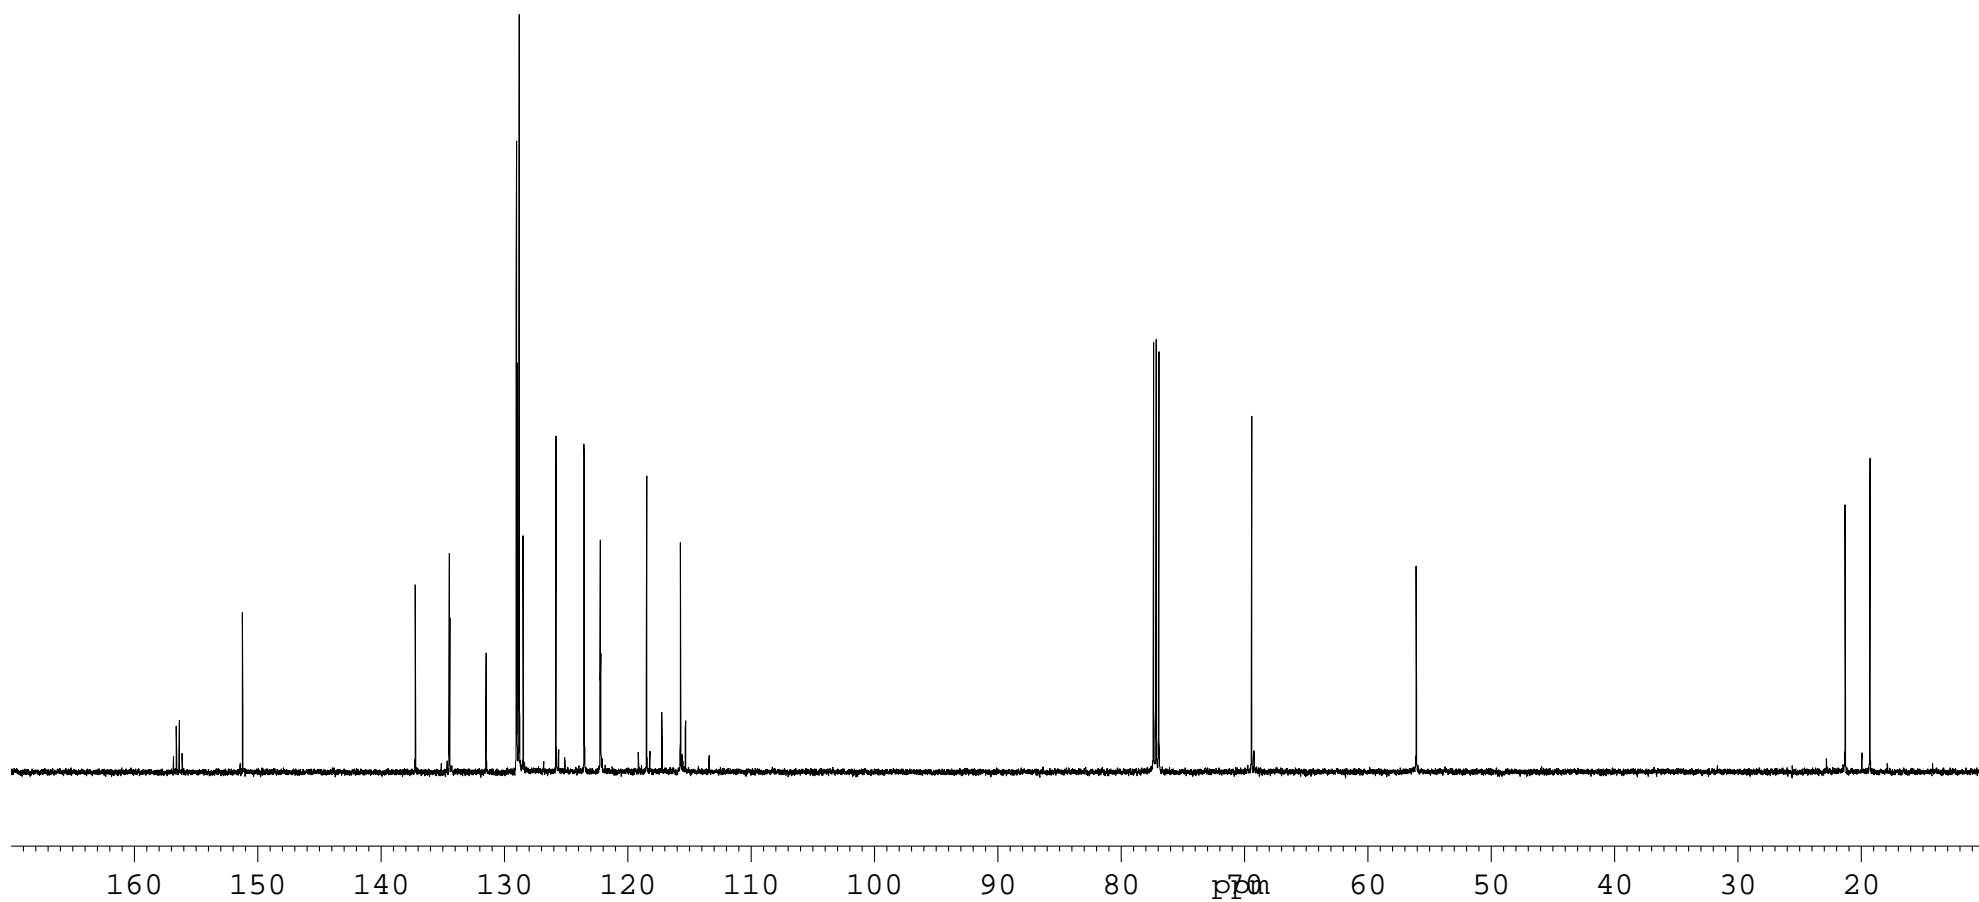

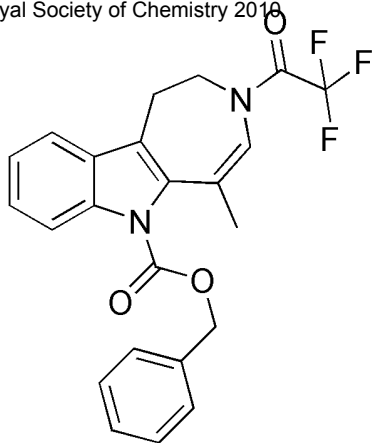

Compound 17, CDCl<sub>3</sub>, 600.13 MHz

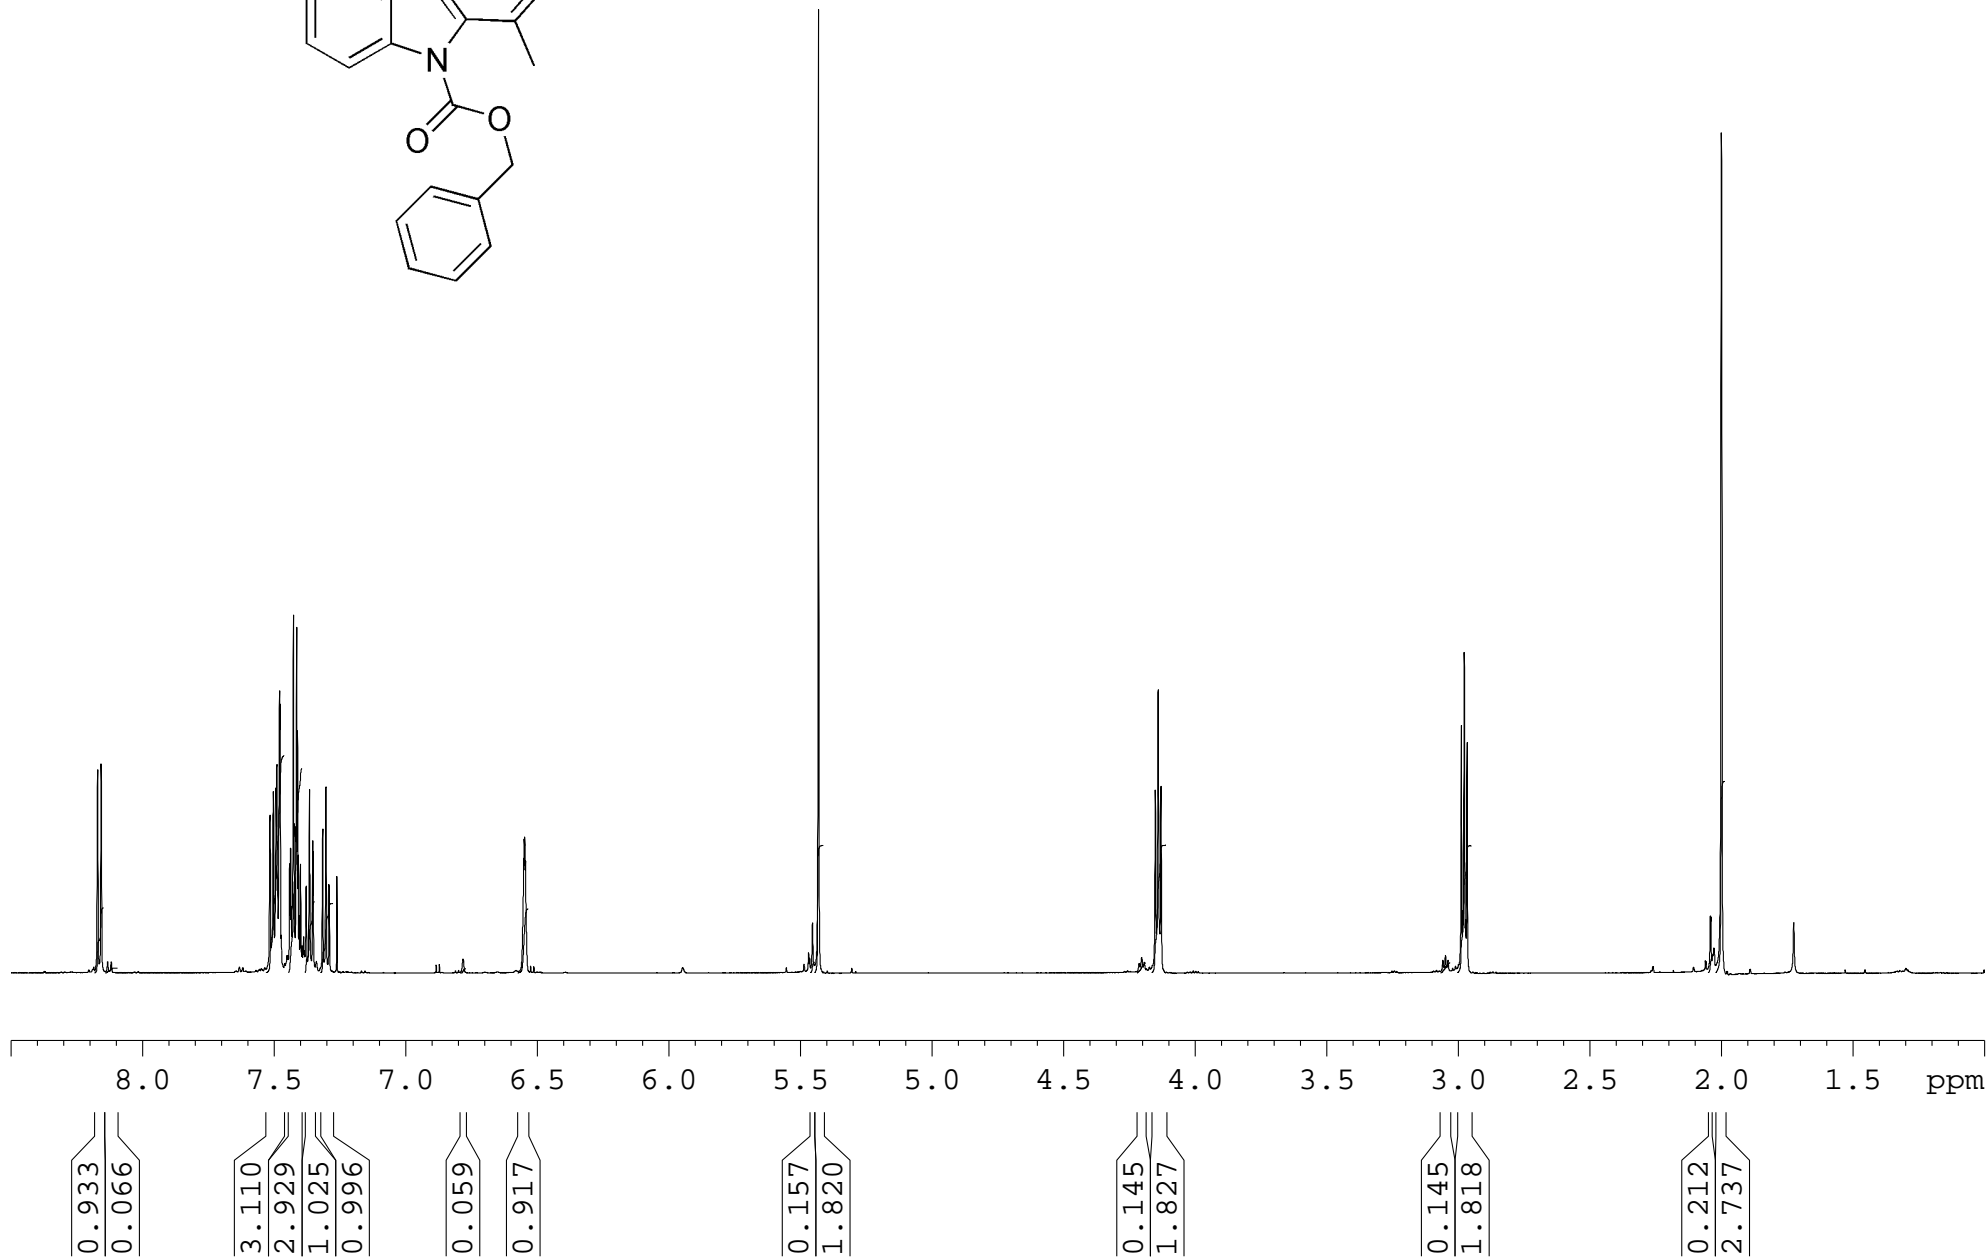

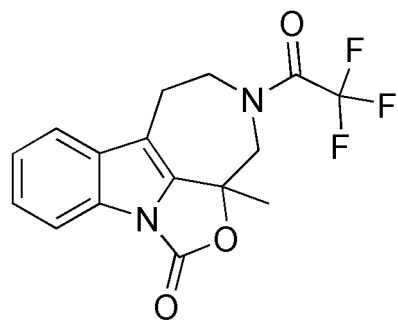

Compound 18, CDCl<sub>3</sub>, 150.9 MHz

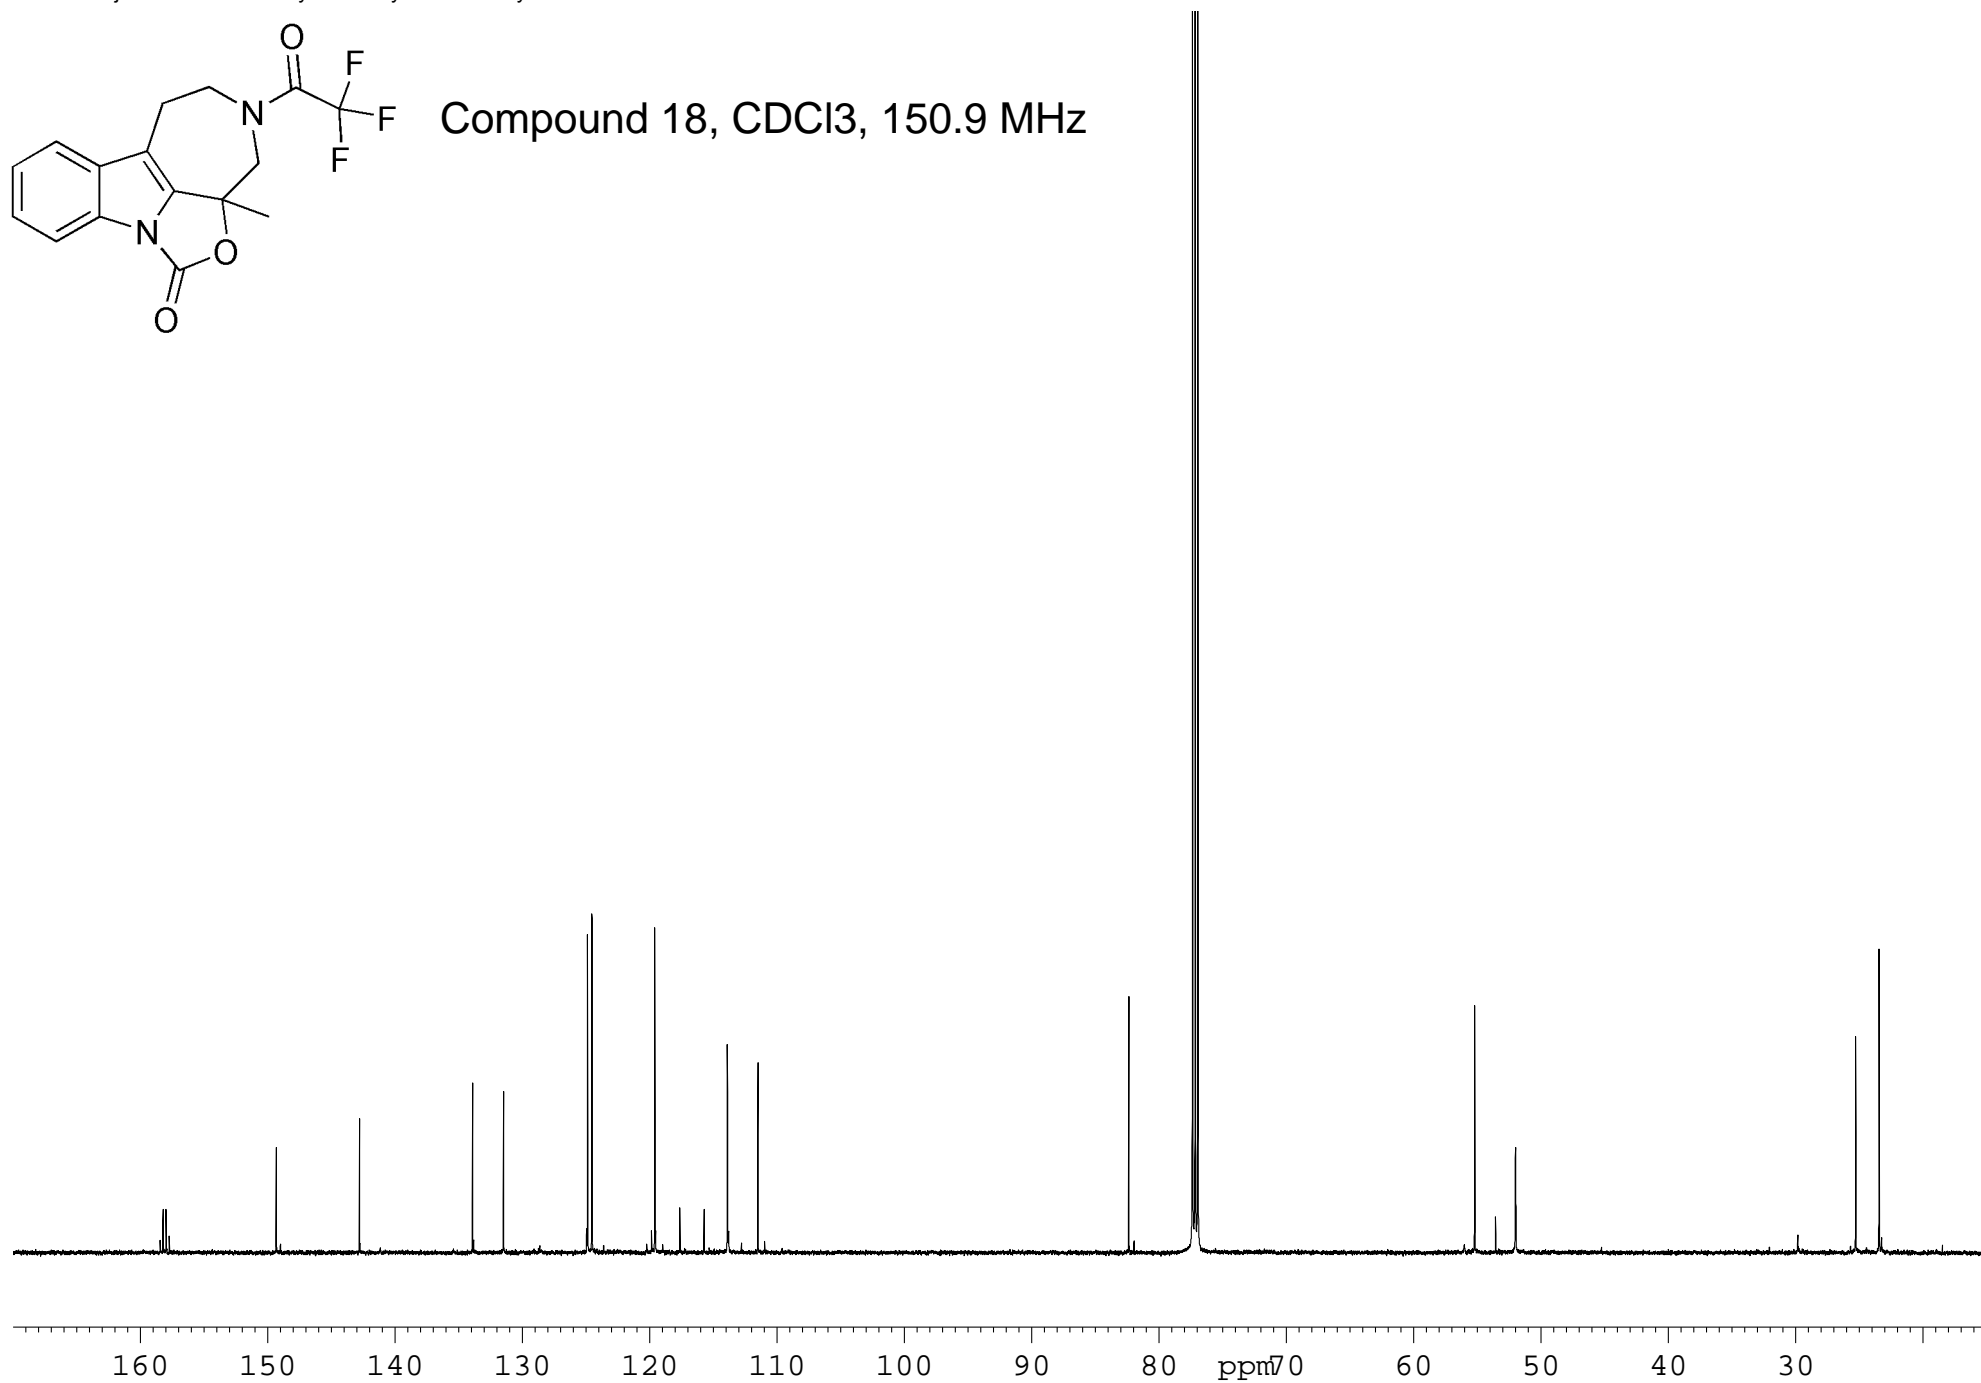

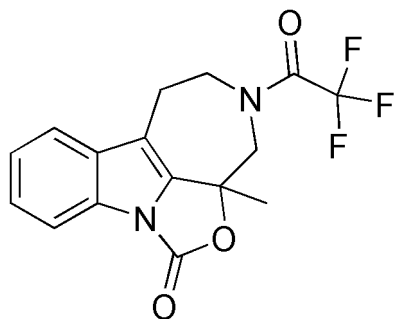

Compound 18, CDCl<sub>3</sub>, 600.13 MHz

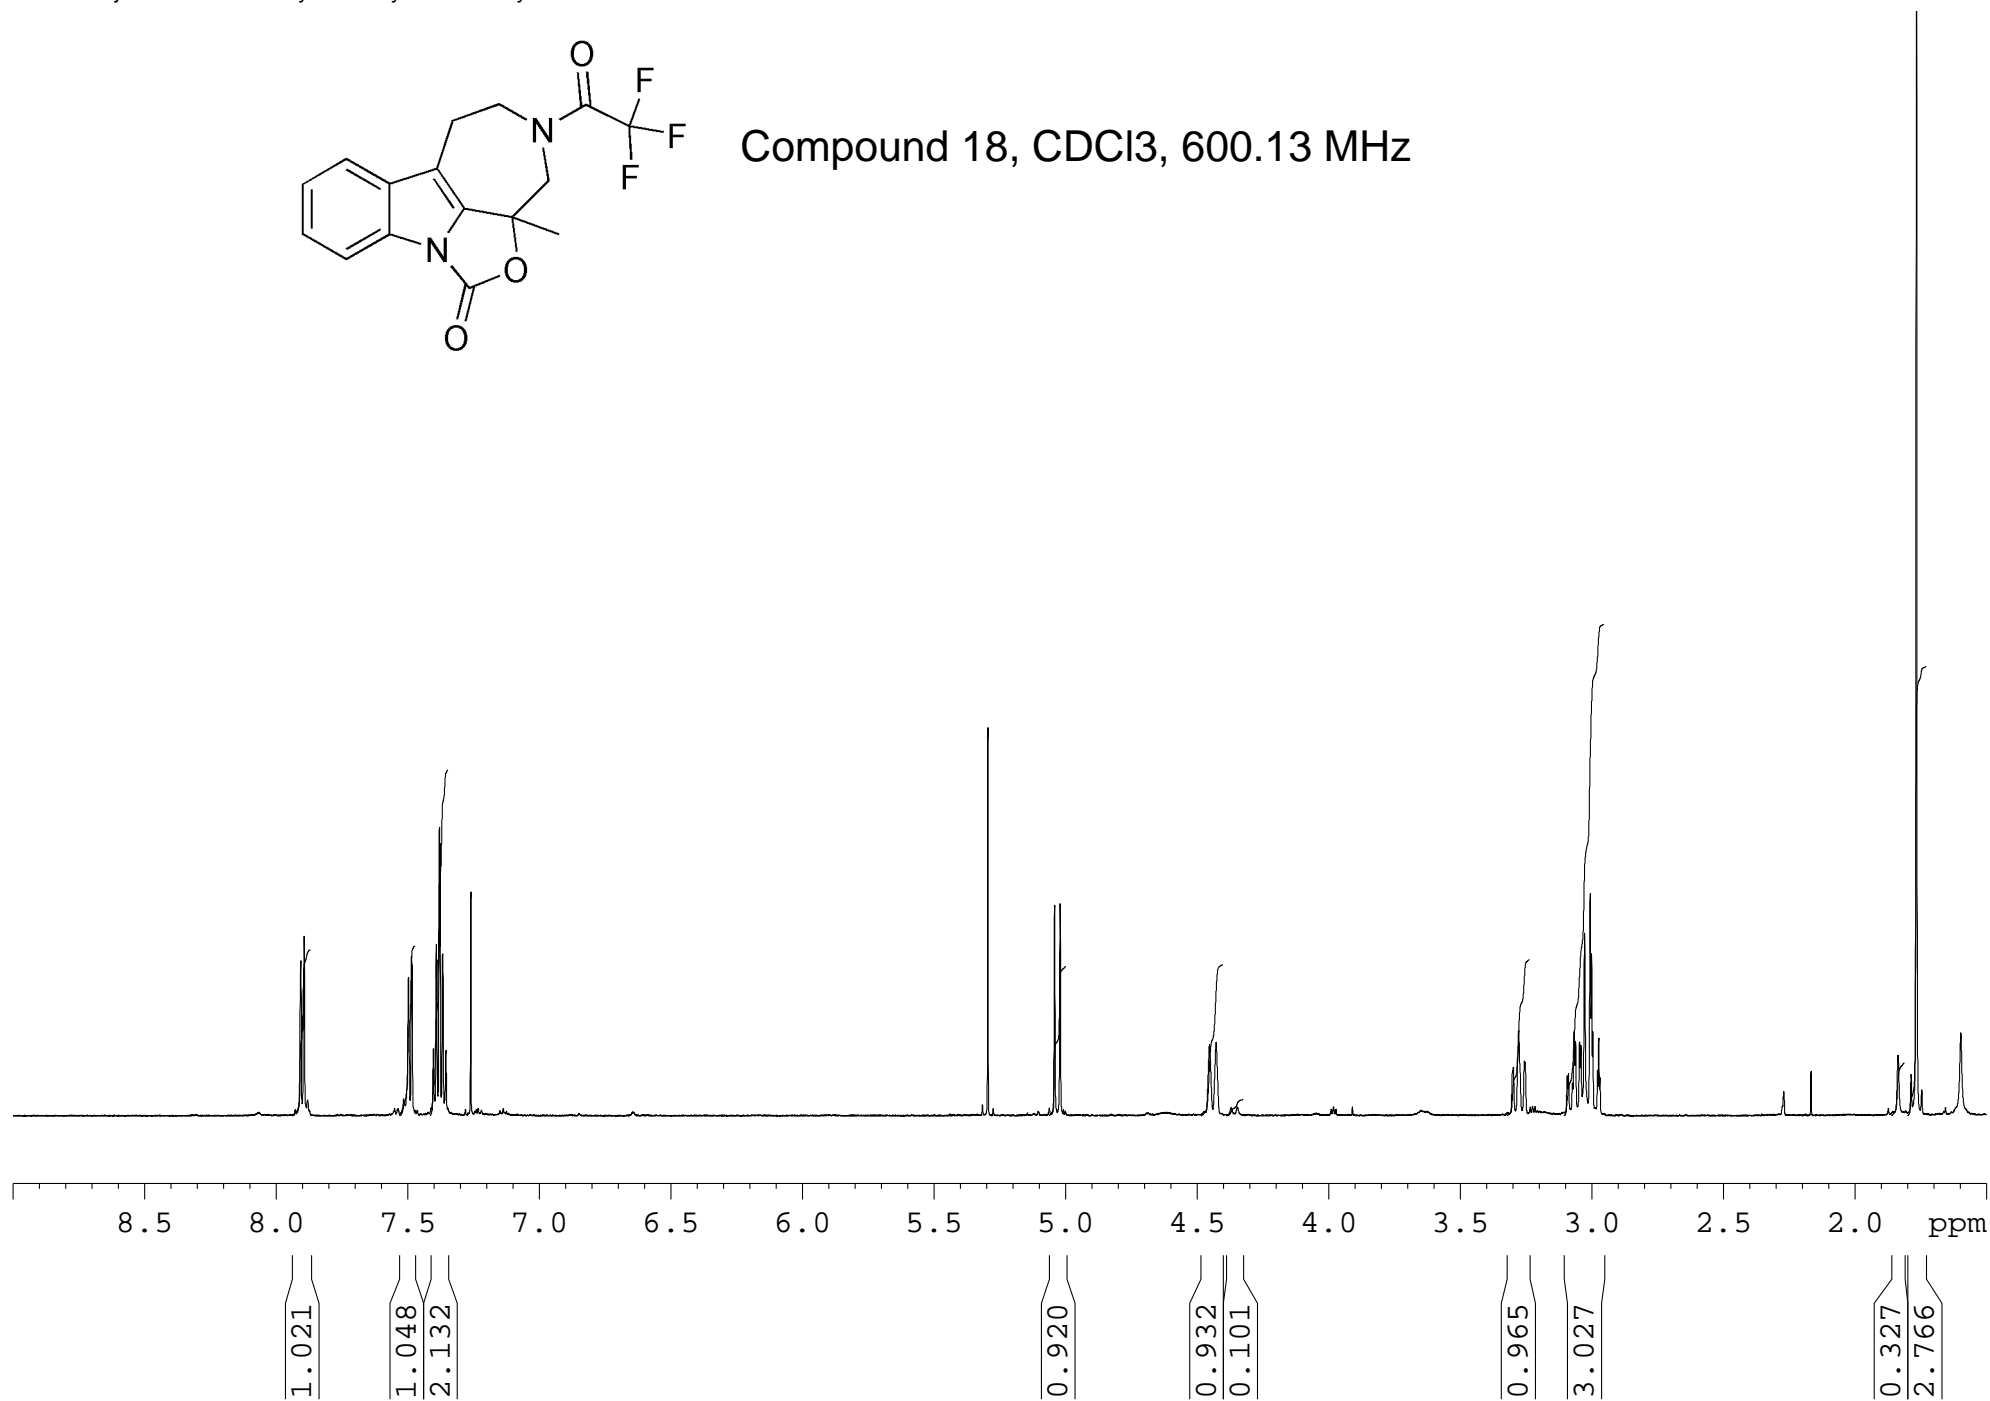

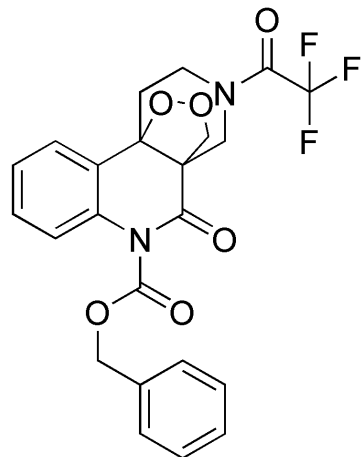

Compound 20, CDCl<sub>3</sub>, 125.75 MHz

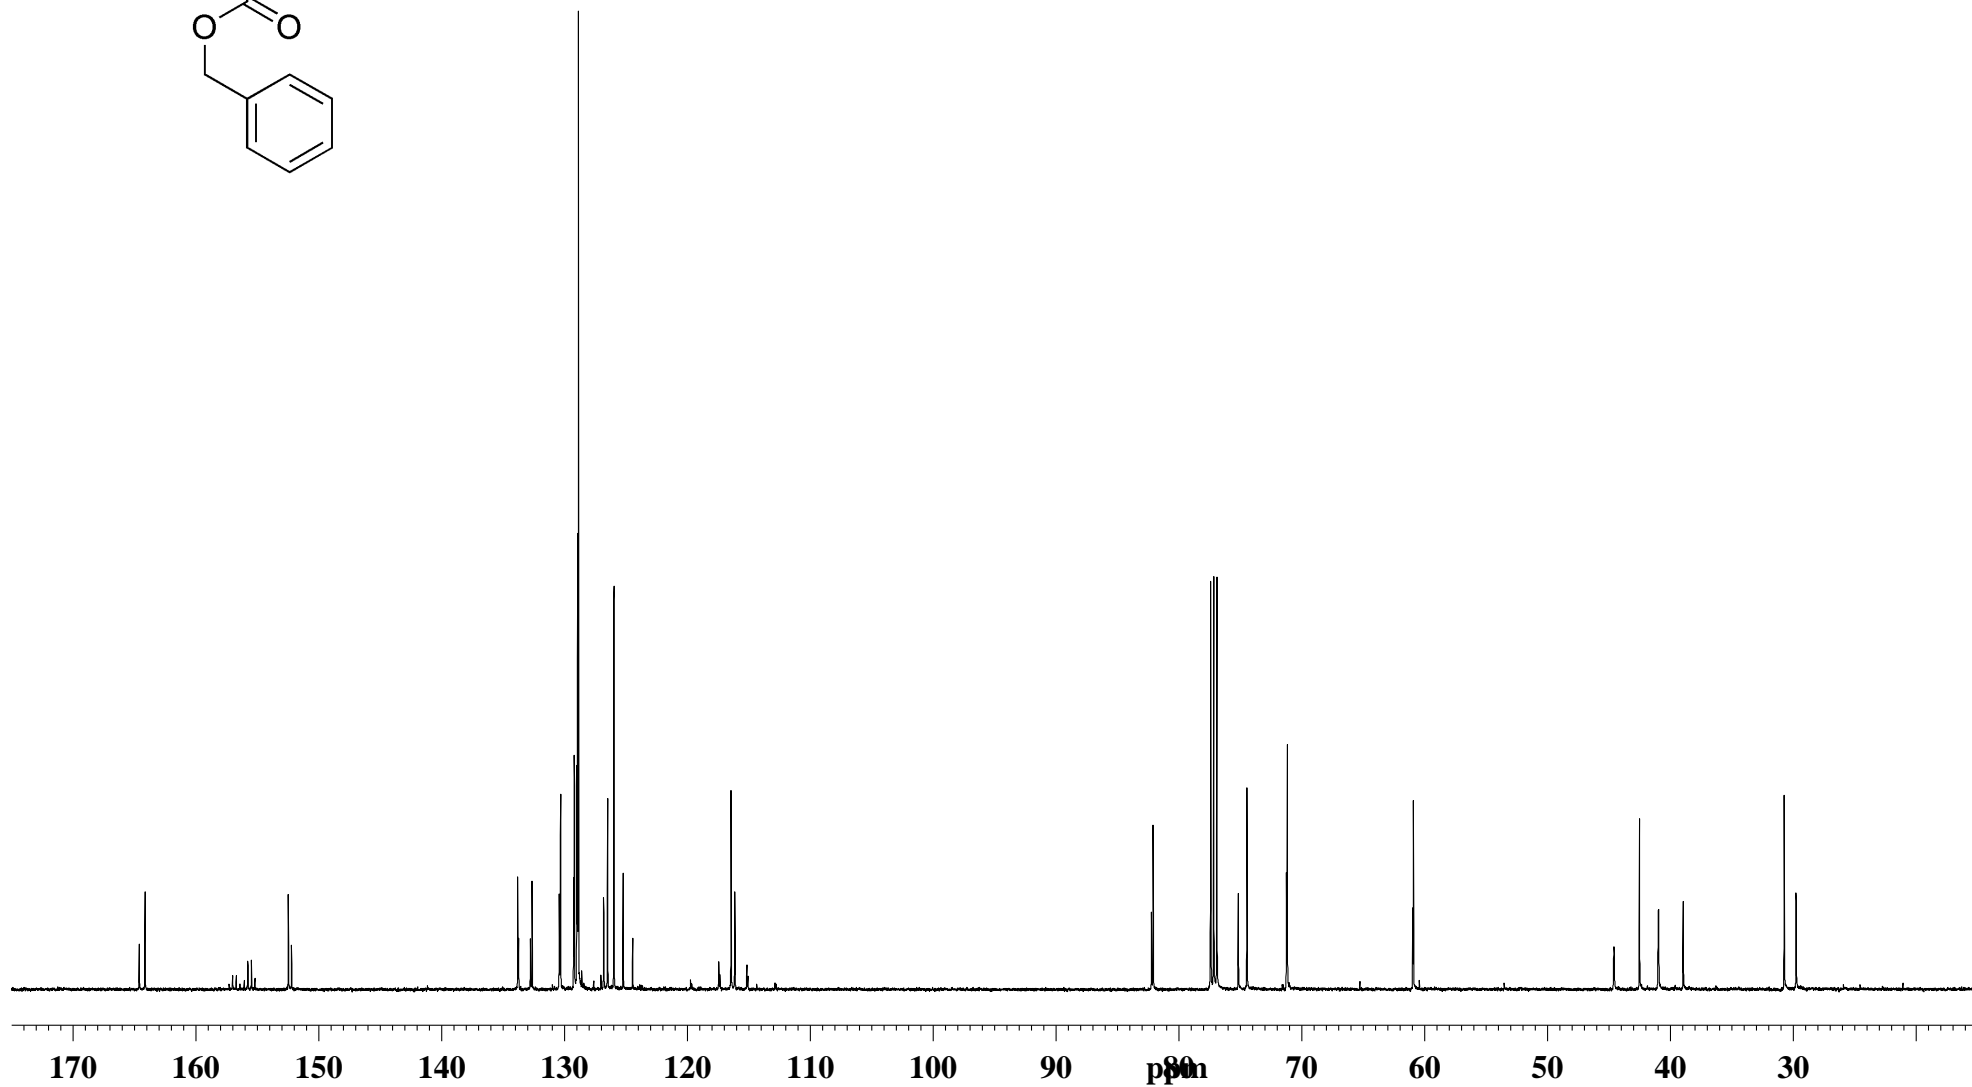

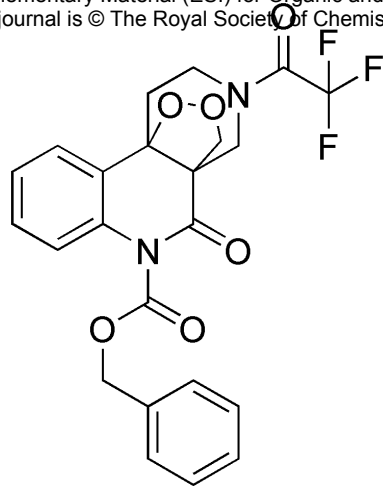

Compound 20, CDCl<sub>3</sub>, 500.13 MHz

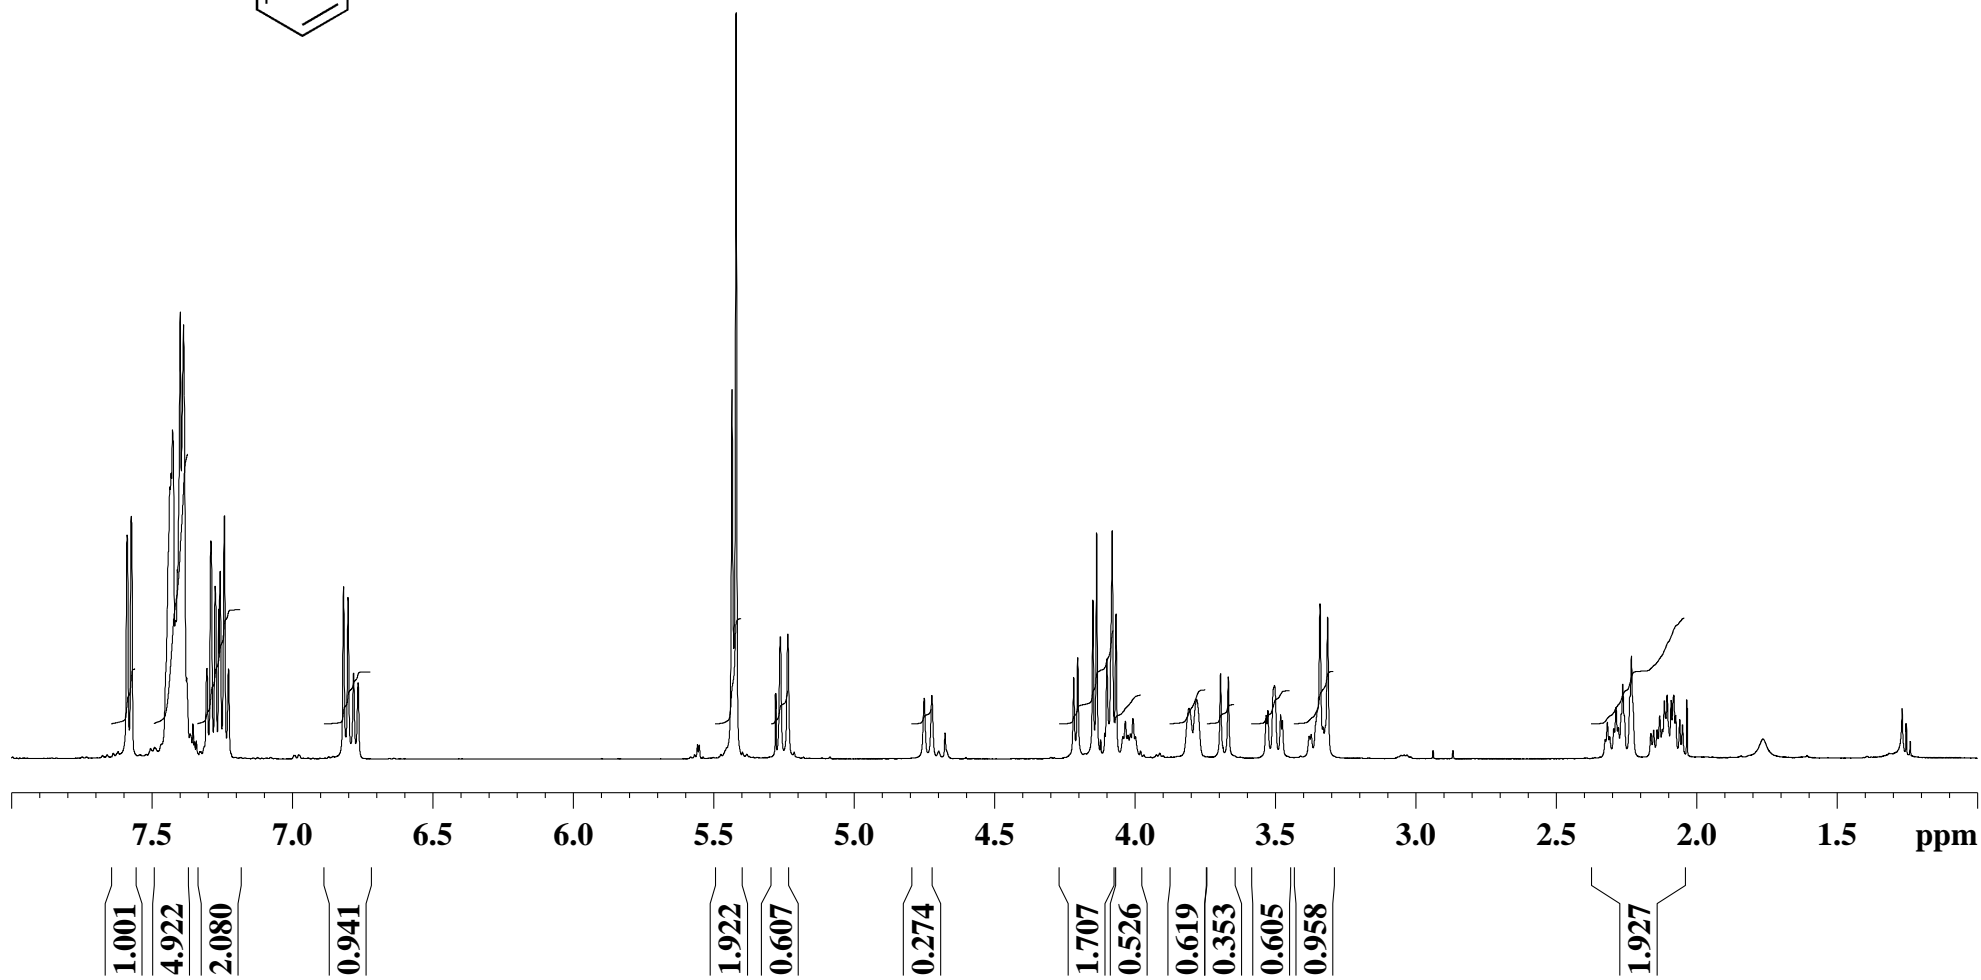

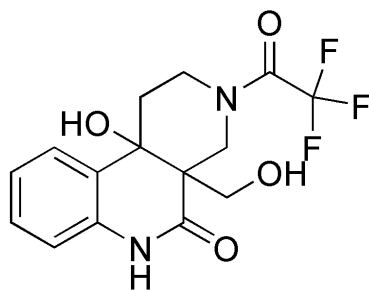

Compound 21, acetone-D<sub>6</sub>, 150.9 MHz

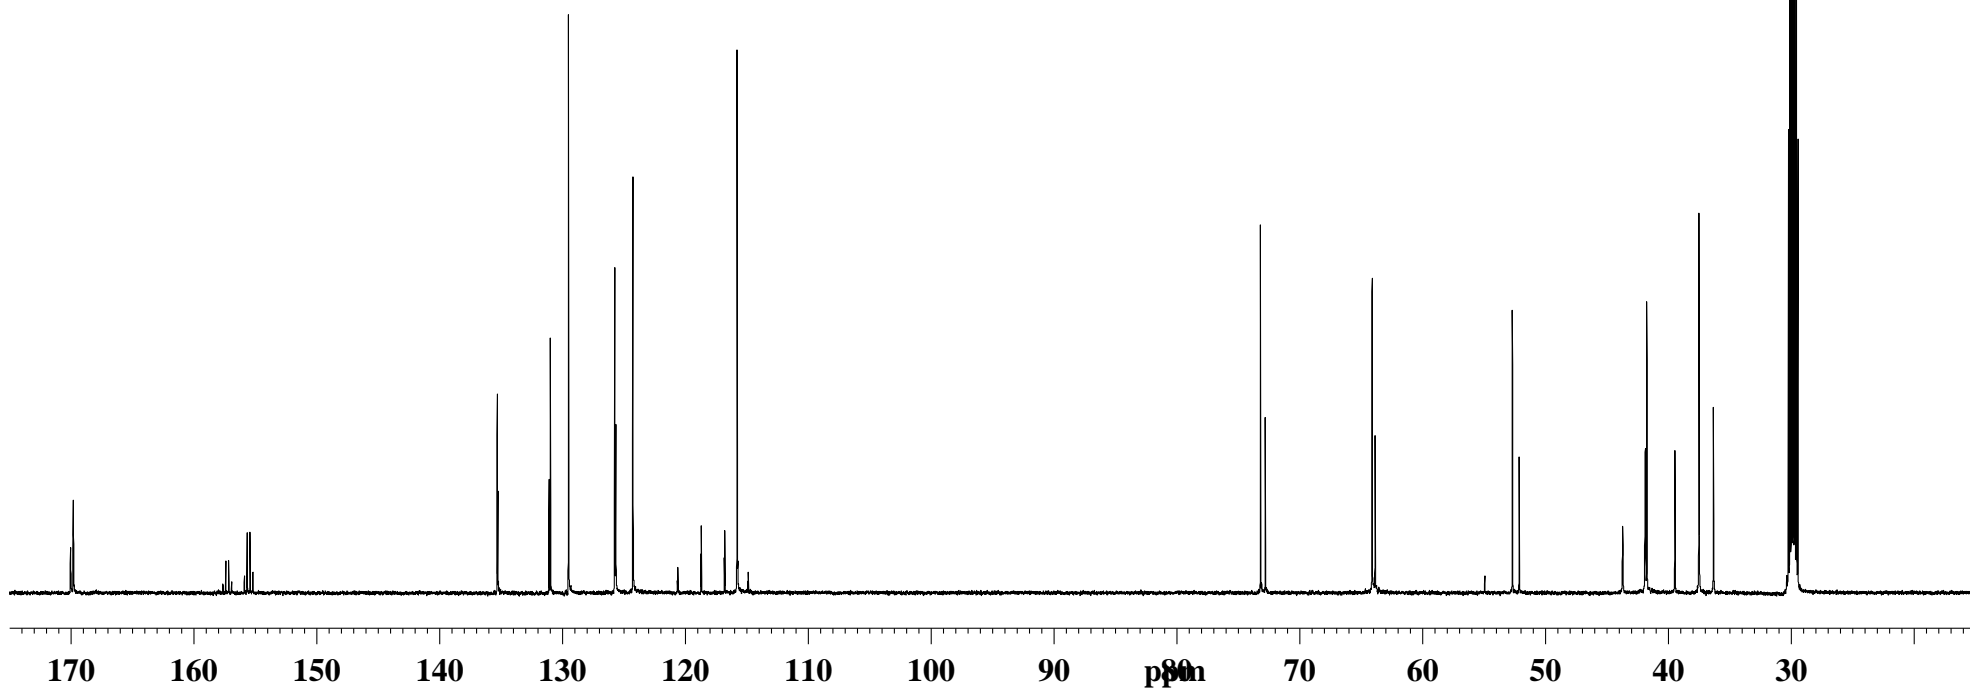



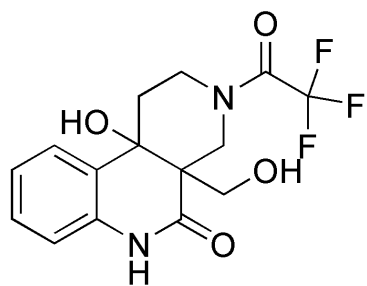

Compound 21, acetone-D<sub>6</sub>, 600.13 MHz

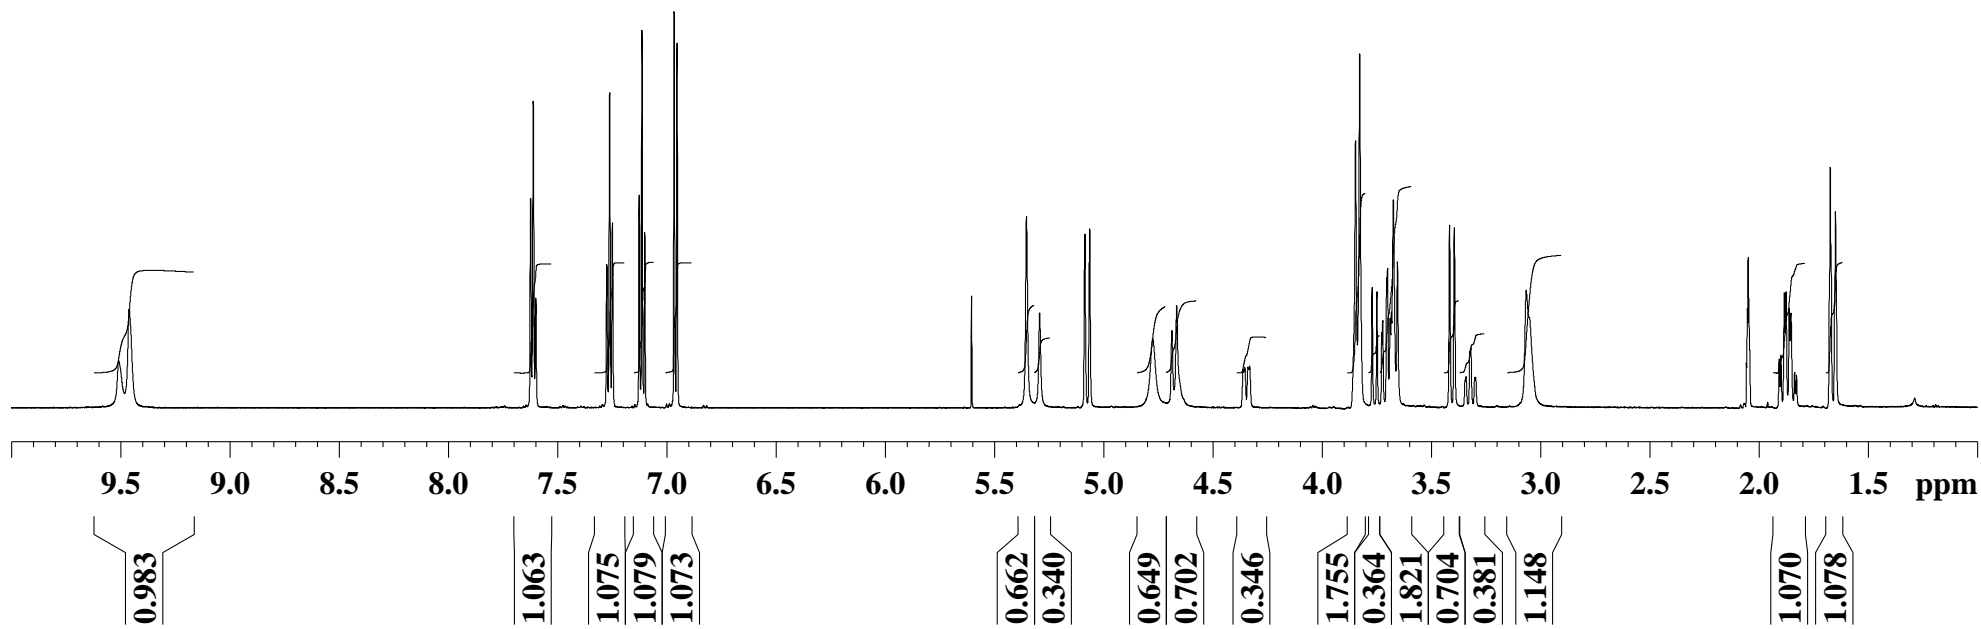

Supplement: c003742g.pdf [file c003742g.pdf]
